# Supplementary material for: Further improvements of finite sample approximation of central limit theorems for envelopment estimators
Source: Springer Nature journal article supplement (doi:10.1007/s11123-023-00661-8), 2023-02-02
Supplement: 11123_2023_661_MOESM1_ESM.pdf [file 11123_2023_661_MOESM1_ESM.pdf]

# Appendix for “Further Improvements of Finite Sample Approximation of Central Limit Theorems for Envelopment Estimator”

LÉOPOLD SIMAR

VALENTIN ZELENYUK

SHIRONG ZHAO\*

January 2023

---

\*Simar: Institut de Statistique, Biostatistique et Sciences Actuarielles, Université Catholique de Louvain, Voie du Roman Pays 20, B1348 Louvain-la-Neuve, Belgium; email: leopold.simar@uclouvain.be.

Zelenyuk: School of Economics and Centre for Efficiency and Productivity Analysis (CEPA), University of Queensland, Colin Clark Building (39), St Lucia, Brisbane, Qld 4072, Australia; email: v.zelenyuk@uq.edu.au.

Zhao (Corresponding Author): School of Finance, Dongbei University of Finance and Economics, Dalian, Liaoning 116025, China; email: shironz@dufe.edu.cn.

Valentin Zelenyuk acknowledges the support from the Australian Research Council (FT170100401) and The University of Queensland. Shirong Zhao acknowledges the support from Liaoning Social Science Foundation (L22CJY011) and Liaoning Provincial Department of Education Research Fund (LJKMZ20221602). Feedback from Bao Hoang Nguyen, Evelyn Smart and Zhichao Wang is appreciated. These individuals and organizations are not responsible for the views expressed here.

# Contents

|   |                                                                       |    |
|---|-----------------------------------------------------------------------|----|
| A | Details and Additional Results from Simulations for VRS-DEA Estimator | 1  |
| B | Details and Additional Results from Simulations for FDH Estimator     | 21 |
| C | Details and Additional Results from Simulations for CRS-DEA Estimator | 40 |

## List of Tables

|     |                                                                            |    |
|-----|----------------------------------------------------------------------------|----|
| A.1 | The Values of $\beta_j$ . . . . .                                          | 2  |
| A.2 | Empirical Coverages for the Simple Mean Efficiency using VRS-DEA Estimator | 3  |
| A.3 | Simple Mean Efficiency and Bias using VRS-DEA Estimator . . . . .          | 9  |
| A.4 | Mean Standard Deviation of Estimated Efficiency using VRS-DEA Estimator    | 15 |
| B.5 | Empirical Coverages for the Simple Mean Efficiency using FDH Estimator .   | 22 |
| B.6 | Simple Mean Efficiency and Bias using FDH Estimator . . . . .              | 28 |
| B.7 | Mean Standard Deviation of Estimated Efficiency using FDH Estimator . . .  | 34 |

## List of Figures

C.1 Empirical Coverages for the Simple Mean Efficiency using CRS-DEA Estimator 41

# Appendix A Details and Additional Results from Simulations for VRS-DEA Estimator

We conduct extensive Monte-Carlo experiments to compare the performance of our proposed method with those in [Kneip et al. \(2015\)](#), [Simar and Zelenyuk \(2020\)](#) and [Nguyen et al. \(2022\)](#). Following [Simar and Zelenyuk \(2020\)](#), we choose the Cobb-Douglas production function (VRS) to simulate the data. Formally,

$$y_i^\partial(x_i) = \prod_{j=1}^p x_{ji}^{\beta_j}, \quad (\text{A.1})$$

where  $1 \times p$  vector  $x_i = (x_{1i}, x_{2i}, \dots, x_{pi})$  and  $x_{ji} \stackrel{\text{iid}}{\sim} \text{Unif}(0, 1)$ ,  $\forall j \in 1, \dots, p$ . In addition, we generate the true inefficiency scores from  $\lambda_i \sim |N(0, 1)| + 1$  (i.e., we generate the true inefficiency from the half normal distribution and then shift it up by 1); it can be shown that the simple mean true efficiency equal to  $1 + \sqrt{\frac{2}{\pi}}$ . The observed output is  $y_i = y^\partial(x_i)/\lambda_i$ , i.e., by projecting  $y^\partial(x_i)$  from the frontier into the production set. Thus a simulated sample  $\mathcal{S}_n = \{x_i, y_i\}_{i=1}^n$  is created. The values of  $\beta_j$ 's are set the same as [Simar and Zelenyuk \(2020\)](#) so that we can directly compare our method with the correction method in [Simar and Zelenyuk \(2020\)](#).

To be more clear, for each experiment (i.e., for each combination of  $p$ ,  $q$  and  $n$ ) we perform 2,000 trials, drawing on each trial a sample of size  $n$  and checking whether the estimated confidence interval covers the simple mean true efficiency. We then take the average of each trial's coverage over 2,000 trials. Finally, we consider 0.90, 0.95 and 0.99 confidence intervals.

Tables [A.1–A.4](#) present additional results not shown in the paper. Table [A.1](#) lists the values of  $\beta_j$ 's used by [Simar and Zelenyuk \(2020\)](#) for each dimension  $p$ . Table [A.2](#) presents the coverages of estimated confidence intervals for the simple mean efficiency using VRS-DEA estimator across different sample sizes and dimensions. Table [A.3](#) presents simple mean efficiency estimates and its estimated bias using VRS-DEA estimator, while Table [A.4](#) presents mean standard deviation of estimated efficiency using VRS-DEA estimator.

**Table A.1:** The Values of  $\beta_j$

| $p$       | 1   | 2   | 3   | 4    | 5    | 7     |
|-----------|-----|-----|-----|------|------|-------|
| $\beta_1$ | 0.4 | 0.4 | 0.4 | 0.4  | 0.4  | 0.05  |
| $\beta_2$ |     | 0.2 | 0.2 | 0.2  | 0.2  | 0.1   |
| $\beta_3$ |     |     | 0.1 | 0.1  | 0.1  | 0.15  |
| $\beta_4$ |     |     |     | 0.15 | 0.15 | 0.2   |
| $\beta_5$ |     |     |     |      | 0.05 | 0.125 |
| $\beta_6$ |     |     |     |      |      | 0.075 |
| $\beta_7$ |     |     |     |      |      | 0.025 |

**Table A.2:** Empirical Coverages for the Simple Mean Efficiency using VRS-DEA Estimator

| Panel A: Without Data Sharpening |     |      |       |       |       |       |       |       |       |       |       |  |
|----------------------------------|-----|------|-------|-------|-------|-------|-------|-------|-------|-------|-------|--|
| $p$                              | $q$ | $n$  | 0.90  |       |       | 0.95  |       |       | 0.99  |       |       |  |
|                                  |     |      | Sol1  | Sol2  | Sol3  | Sol1  | Sol2  | Sol3  | Sol1  | Sol2  | Sol3  |  |
| 1                                | 1   | 10   | 0.506 | 0.571 | 0.667 | 0.576 | 0.624 | 0.726 | 0.674 | 0.723 | 0.810 |  |
| 1                                | 1   | 20   | 0.607 | 0.643 | 0.714 | 0.682 | 0.715 | 0.783 | 0.787 | 0.821 | 0.867 |  |
| 1                                | 1   | 50   | 0.713 | 0.731 | 0.778 | 0.797 | 0.814 | 0.851 | 0.893 | 0.901 | 0.925 |  |
| 1                                | 1   | 100  | 0.785 | 0.792 | 0.826 | 0.856 | 0.863 | 0.885 | 0.937 | 0.941 | 0.952 |  |
| 1                                | 1   | 200  | 0.812 | 0.815 | 0.839 | 0.884 | 0.886 | 0.901 | 0.957 | 0.959 | 0.963 |  |
| 1                                | 1   | 300  | 0.838 | 0.838 | 0.857 | 0.908 | 0.909 | 0.921 | 0.971 | 0.972 | 0.975 |  |
| 1                                | 1   | 500  | 0.845 | 0.846 | 0.856 | 0.916 | 0.916 | 0.921 | 0.977 | 0.977 | 0.979 |  |
| 1                                | 1   | 1000 | 0.858 | 0.858 | 0.866 | 0.909 | 0.909 | 0.916 | 0.976 | 0.976 | 0.978 |  |

  

| Panel B: With Data Sharpening |     |      |       |       |       |       |       |       |       |       |       |  |
|-------------------------------|-----|------|-------|-------|-------|-------|-------|-------|-------|-------|-------|--|
| $p$                           | $q$ | $n$  | 0.90  |       |       | 0.95  |       |       | 0.99  |       |       |  |
|                               |     |      | Sol4  | Sol5  | Sol6  | Sol4  | Sol5  | Sol6  | Sol4  | Sol5  | Sol6  |  |
| 1                             | 1   | 10   | 0.550 | 0.640 | 0.752 | 0.621 | 0.715 | 0.803 | 0.739 | 0.809 | 0.878 |  |
| 1                             | 1   | 20   | 0.646 | 0.692 | 0.757 | 0.718 | 0.753 | 0.823 | 0.817 | 0.852 | 0.892 |  |
| 1                             | 1   | 50   | 0.734 | 0.750 | 0.796 | 0.808 | 0.828 | 0.863 | 0.902 | 0.916 | 0.943 |  |
| 1                             | 1   | 100  | 0.803 | 0.807 | 0.826 | 0.867 | 0.871 | 0.897 | 0.943 | 0.947 | 0.958 |  |
| 1                             | 1   | 200  | 0.817 | 0.820 | 0.841 | 0.890 | 0.892 | 0.907 | 0.958 | 0.959 | 0.967 |  |
| 1                             | 1   | 300  | 0.847 | 0.849 | 0.864 | 0.910 | 0.912 | 0.922 | 0.973 | 0.974 | 0.978 |  |
| 1                             | 1   | 500  | 0.844 | 0.847 | 0.856 | 0.916 | 0.916 | 0.924 | 0.978 | 0.979 | 0.980 |  |
| 1                             | 1   | 1000 | 0.860 | 0.860 | 0.868 | 0.914 | 0.914 | 0.917 | 0.976 | 0.976 | 0.979 |  |

**Table A.2:** Empirical Coverages for the Simple Mean Efficiency using VRS-DEA Estimator  
(continued)

Panel A: Without Data Sharpening

| $p$ | $q$ | $n$  | 0.90  |       | 0.95  |       | 0.99  |       |       |       |       |
|-----|-----|------|-------|-------|-------|-------|-------|-------|-------|-------|-------|
|     |     |      | Sol1  | Sol2  | Sol3  | Sol1  | Sol2  | Sol3  | Sol1  | Sol2  | Sol3  |
| 2   | 1   | 10   | 0.273 | 0.339 | 0.503 | 0.317 | 0.390 | 0.566 | 0.398 | 0.484 | 0.667 |
| 2   | 1   | 20   | 0.374 | 0.442 | 0.584 | 0.443 | 0.511 | 0.661 | 0.556 | 0.622 | 0.783 |
| 2   | 1   | 50   | 0.508 | 0.550 | 0.656 | 0.577 | 0.625 | 0.739 | 0.721 | 0.773 | 0.871 |
| 2   | 1   | 100  | 0.629 | 0.661 | 0.722 | 0.702 | 0.733 | 0.806 | 0.827 | 0.856 | 0.911 |
| 2   | 1   | 200  | 0.709 | 0.729 | 0.778 | 0.786 | 0.806 | 0.857 | 0.897 | 0.907 | 0.937 |
| 2   | 1   | 300  | 0.738 | 0.747 | 0.788 | 0.811 | 0.826 | 0.859 | 0.914 | 0.920 | 0.947 |
| 2   | 1   | 500  | 0.768 | 0.779 | 0.820 | 0.856 | 0.865 | 0.894 | 0.942 | 0.947 | 0.961 |
| 2   | 1   | 1000 | 0.828 | 0.833 | 0.851 | 0.897 | 0.900 | 0.911 | 0.956 | 0.960 | 0.969 |

Panel B: With Data Sharpening

| $p$ | $q$ | $n$  | 0.90  |       | 0.95  |       | 0.99  |       |       |       |       |
|-----|-----|------|-------|-------|-------|-------|-------|-------|-------|-------|-------|
|     |     |      | Sol4  | Sol5  | Sol6  | Sol4  | Sol5  | Sol6  | Sol4  | Sol5  | Sol6  |
| 2   | 1   | 10   | 0.399 | 0.531 | 0.703 | 0.463 | 0.592 | 0.759 | 0.564 | 0.687 | 0.845 |
| 2   | 1   | 20   | 0.503 | 0.606 | 0.746 | 0.574 | 0.688 | 0.813 | 0.702 | 0.790 | 0.896 |
| 2   | 1   | 50   | 0.607 | 0.671 | 0.775 | 0.696 | 0.759 | 0.851 | 0.826 | 0.868 | 0.931 |
| 2   | 1   | 100  | 0.684 | 0.723 | 0.803 | 0.772 | 0.811 | 0.871 | 0.888 | 0.913 | 0.953 |
| 2   | 1   | 200  | 0.754 | 0.773 | 0.828 | 0.833 | 0.852 | 0.886 | 0.926 | 0.940 | 0.962 |
| 2   | 1   | 300  | 0.770 | 0.786 | 0.829 | 0.852 | 0.864 | 0.895 | 0.935 | 0.943 | 0.962 |
| 2   | 1   | 500  | 0.792 | 0.803 | 0.829 | 0.871 | 0.877 | 0.902 | 0.953 | 0.958 | 0.973 |
| 2   | 1   | 1000 | 0.844 | 0.849 | 0.867 | 0.902 | 0.905 | 0.921 | 0.968 | 0.969 | 0.975 |



**Table A.2:** Empirical Coverages for the Simple Mean Efficiency using VRS-DEA Estimator  
(continued)

Panel A: Without Data Sharpening

| $p$ | $q$ | $n$  | 0.90  |       | 0.95  |       | 0.99  |       |       |       |       |
|-----|-----|------|-------|-------|-------|-------|-------|-------|-------|-------|-------|
|     |     |      | Sol1  | Sol2  | Sol3  | Sol1  | Sol2  | Sol3  | Sol1  | Sol2  | Sol3  |
| 3   | 1   | 10   | 0.177 | 0.254 | 0.450 | 0.218 | 0.293 | 0.510 | 0.277 | 0.367 | 0.625 |
| 3   | 1   | 20   | 0.264 | 0.371 | 0.598 | 0.330 | 0.445 | 0.685 | 0.441 | 0.560 | 0.808 |
| 3   | 1   | 50   | 0.458 | 0.545 | 0.736 | 0.541 | 0.635 | 0.818 | 0.695 | 0.783 | 0.926 |
| 3   | 1   | 100  | 0.612 | 0.679 | 0.797 | 0.694 | 0.750 | 0.867 | 0.822 | 0.878 | 0.953 |
| 3   | 1   | 200  | 0.724 | 0.771 | 0.855 | 0.803 | 0.848 | 0.922 | 0.916 | 0.947 | 0.981 |
| 3   | 1   | 300  | 0.766 | 0.807 | 0.872 | 0.853 | 0.875 | 0.926 | 0.939 | 0.960 | 0.984 |
| 3   | 1   | 500  | 0.837 | 0.857 | 0.910 | 0.903 | 0.919 | 0.952 | 0.968 | 0.978 | 0.991 |
| 3   | 1   | 1000 | 0.867 | 0.879 | 0.919 | 0.929 | 0.938 | 0.963 | 0.985 | 0.989 | 0.995 |

Panel B: With Data Sharpening

| $p$ | $q$ | $n$  | 0.90  |       | 0.95  |       | 0.99  |       |       |       |       |
|-----|-----|------|-------|-------|-------|-------|-------|-------|-------|-------|-------|
|     |     |      | Sol4  | Sol5  | Sol6  | Sol4  | Sol5  | Sol6  | Sol4  | Sol5  | Sol6  |
| 3   | 1   | 10   | 0.361 | 0.498 | 0.717 | 0.420 | 0.560 | 0.767 | 0.531 | 0.655 | 0.833 |
| 3   | 1   | 20   | 0.498 | 0.648 | 0.834 | 0.577 | 0.719 | 0.885 | 0.688 | 0.812 | 0.947 |
| 3   | 1   | 50   | 0.665 | 0.776 | 0.896 | 0.742 | 0.841 | 0.943 | 0.852 | 0.920 | 0.980 |
| 3   | 1   | 100  | 0.744 | 0.824 | 0.914 | 0.828 | 0.890 | 0.954 | 0.922 | 0.956 | 0.989 |
| 3   | 1   | 200  | 0.805 | 0.864 | 0.932 | 0.886 | 0.925 | 0.966 | 0.959 | 0.982 | 0.994 |
| 3   | 1   | 300  | 0.823 | 0.854 | 0.915 | 0.892 | 0.917 | 0.964 | 0.967 | 0.978 | 0.994 |
| 3   | 1   | 500  | 0.859 | 0.878 | 0.926 | 0.915 | 0.935 | 0.963 | 0.979 | 0.985 | 0.997 |
| 3   | 1   | 1000 | 0.870 | 0.886 | 0.925 | 0.937 | 0.947 | 0.966 | 0.983 | 0.988 | 0.996 |

**Table A.2:** Empirical Coverages for the Simple Mean Efficiency using VRS-DEA Estimator  
(continued)

Panel A: Without Data Sharpening

| $p$ | $q$ | $n$  | 0.90  |       | 0.95  |       | 0.99  |       |       |       |       |
|-----|-----|------|-------|-------|-------|-------|-------|-------|-------|-------|-------|
|     |     |      | Sol1  | Sol2  | Sol3  | Sol1  | Sol2  | Sol3  | Sol1  | Sol2  | Sol3  |
| 4   | 1   | 10   | 0.108 | 0.166 | 0.366 | 0.131 | 0.193 | 0.427 | 0.171 | 0.266 | 0.517 |
| 4   | 1   | 20   | 0.148 | 0.234 | 0.504 | 0.185 | 0.284 | 0.597 | 0.257 | 0.384 | 0.735 |
| 4   | 1   | 50   | 0.306 | 0.425 | 0.707 | 0.376 | 0.526 | 0.806 | 0.521 | 0.687 | 0.925 |
| 4   | 1   | 100  | 0.451 | 0.573 | 0.800 | 0.547 | 0.682 | 0.893 | 0.721 | 0.837 | 0.968 |
| 4   | 1   | 200  | 0.634 | 0.728 | 0.875 | 0.730 | 0.823 | 0.950 | 0.874 | 0.943 | 0.994 |
| 4   | 1   | 300  | 0.713 | 0.791 | 0.893 | 0.804 | 0.865 | 0.953 | 0.913 | 0.957 | 0.995 |
| 4   | 1   | 500  | 0.799 | 0.849 | 0.931 | 0.879 | 0.923 | 0.977 | 0.967 | 0.984 | 0.998 |
| 4   | 1   | 1000 | 0.851 | 0.883 | 0.941 | 0.918 | 0.943 | 0.975 | 0.980 | 0.987 | 0.998 |

Panel B: With Data Sharpening

| $p$ | $q$ | $n$  | 0.90  |       | 0.95  |       | 0.99  |       |       |       |       |
|-----|-----|------|-------|-------|-------|-------|-------|-------|-------|-------|-------|
|     |     |      | Sol4  | Sol5  | Sol6  | Sol4  | Sol5  | Sol6  | Sol4  | Sol5  | Sol6  |
| 4   | 1   | 10   | 0.319 | 0.439 | 0.639 | 0.388 | 0.485 | 0.675 | 0.482 | 0.578 | 0.731 |
| 4   | 1   | 20   | 0.407 | 0.554 | 0.805 | 0.464 | 0.625 | 0.869 | 0.586 | 0.722 | 0.933 |
| 4   | 1   | 50   | 0.608 | 0.771 | 0.928 | 0.697 | 0.837 | 0.964 | 0.815 | 0.914 | 0.995 |
| 4   | 1   | 100  | 0.717 | 0.850 | 0.954 | 0.805 | 0.909 | 0.979 | 0.910 | 0.969 | 0.997 |
| 4   | 1   | 200  | 0.822 | 0.911 | 0.977 | 0.904 | 0.955 | 0.994 | 0.970 | 0.995 | 1.000 |
| 4   | 1   | 300  | 0.835 | 0.900 | 0.968 | 0.901 | 0.953 | 0.992 | 0.972 | 0.993 | 1.000 |
| 4   | 1   | 500  | 0.868 | 0.928 | 0.971 | 0.935 | 0.966 | 0.989 | 0.982 | 0.992 | 0.999 |
| 4   | 1   | 1000 | 0.870 | 0.903 | 0.949 | 0.924 | 0.950 | 0.980 | 0.980 | 0.992 | 0.999 |

**Table A.2:** Empirical Coverages for the Simple Mean Efficiency using VRS-DEA Estimator  
(continued)

Panel A: Without Data Sharpening

| $p$ | $q$ | $n$  | 0.90  |       |       | 0.95  |       |       | 0.99  |       |       |
|-----|-----|------|-------|-------|-------|-------|-------|-------|-------|-------|-------|
|     |     |      | Sol1  | Sol2  | Sol3  | Sol1  | Sol2  | Sol3  | Sol1  | Sol2  | Sol3  |
| 5   | 1   | 10   | 0.065 | 0.108 | 0.287 | 0.083 | 0.136 | 0.336 | 0.108 | 0.176 | 0.402 |
| 5   | 1   | 20   | 0.092 | 0.165 | 0.464 | 0.118 | 0.204 | 0.555 | 0.176 | 0.294 | 0.685 |
| 5   | 1   | 50   | 0.174 | 0.293 | 0.682 | 0.227 | 0.389 | 0.794 | 0.349 | 0.556 | 0.912 |
| 5   | 1   | 100  | 0.357 | 0.515 | 0.843 | 0.459 | 0.635 | 0.932 | 0.625 | 0.819 | 0.989 |
| 5   | 1   | 200  | 0.544 | 0.687 | 0.912 | 0.646 | 0.796 | 0.973 | 0.822 | 0.933 | 0.997 |
| 5   | 1   | 300  | 0.671 | 0.784 | 0.930 | 0.765 | 0.871 | 0.979 | 0.894 | 0.967 | 0.999 |
| 5   | 1   | 500  | 0.776 | 0.861 | 0.963 | 0.857 | 0.928 | 0.990 | 0.961 | 0.989 | 1.000 |
| 5   | 1   | 1000 | 0.841 | 0.904 | 0.975 | 0.917 | 0.964 | 0.994 | 0.984 | 0.996 | 1.000 |

Panel B: With Data Sharpening

| $p$ | $q$ | $n$  | 0.90  |       |       | 0.95  |       |       | 0.99  |       |       |
|-----|-----|------|-------|-------|-------|-------|-------|-------|-------|-------|-------|
|     |     |      | Sol4  | Sol5  | Sol6  | Sol4  | Sol5  | Sol6  | Sol4  | Sol5  | Sol6  |
| 5   | 1   | 10   | 0.275 | 0.360 | 0.509 | 0.322 | 0.401 | 0.543 | 0.409 | 0.472 | 0.593 |
| 5   | 1   | 20   | 0.350 | 0.517 | 0.802 | 0.427 | 0.576 | 0.853 | 0.548 | 0.685 | 0.911 |
| 5   | 1   | 50   | 0.536 | 0.732 | 0.945 | 0.617 | 0.799 | 0.974 | 0.764 | 0.895 | 0.994 |
| 5   | 1   | 100  | 0.724 | 0.891 | 0.987 | 0.814 | 0.940 | 0.996 | 0.922 | 0.984 | 1.000 |
| 5   | 1   | 200  | 0.823 | 0.931 | 0.993 | 0.890 | 0.975 | 0.999 | 0.970 | 0.997 | 1.000 |
| 5   | 1   | 300  | 0.838 | 0.938 | 0.995 | 0.905 | 0.978 | 1.000 | 0.977 | 0.999 | 1.000 |
| 5   | 1   | 500  | 0.870 | 0.939 | 0.990 | 0.927 | 0.978 | 0.998 | 0.982 | 0.997 | 1.000 |
| 5   | 1   | 1000 | 0.846 | 0.910 | 0.963 | 0.911 | 0.952 | 0.991 | 0.971 | 0.995 | 1.000 |

**Table A.2:** Empirical Coverages for the Simple Mean Efficiency using VRS-DEA Estimator  
(continued)

Panel A: Without Data Sharpening

| $p$ | $q$ | $n$  | 0.90  |       |       | 0.95  |       |       | 0.99  |       |       |
|-----|-----|------|-------|-------|-------|-------|-------|-------|-------|-------|-------|
|     |     |      | Sol1  | Sol2  | Sol3  | Sol1  | Sol2  | Sol3  | Sol1  | Sol2  | Sol3  |
| 7   | 1   | 10   | 0.036 | 0.072 | 0.190 | 0.046 | 0.085 | 0.213 | 0.064 | 0.109 | 0.251 |
| 7   | 1   | 20   | 0.035 | 0.084 | 0.382 | 0.048 | 0.111 | 0.453 | 0.080 | 0.175 | 0.572 |
| 7   | 1   | 50   | 0.079 | 0.184 | 0.674 | 0.115 | 0.246 | 0.787 | 0.194 | 0.391 | 0.917 |
| 7   | 1   | 100  | 0.178 | 0.350 | 0.862 | 0.242 | 0.456 | 0.937 | 0.378 | 0.663 | 0.990 |
| 7   | 1   | 200  | 0.344 | 0.575 | 0.947 | 0.451 | 0.703 | 0.991 | 0.646 | 0.887 | 1.000 |
| 7   | 1   | 300  | 0.499 | 0.739 | 0.980 | 0.623 | 0.850 | 0.997 | 0.815 | 0.973 | 1.000 |
| 7   | 1   | 500  | 0.670 | 0.859 | 0.992 | 0.774 | 0.933 | 1.000 | 0.925 | 0.992 | 1.000 |
| 7   | 1   | 1000 | 0.813 | 0.920 | 0.995 | 0.887 | 0.970 | 1.000 | 0.971 | 0.998 | 1.000 |

Panel B: With Data Sharpening

| $p$ | $q$ | $n$  | 0.90  |       |       | 0.95  |       |       | 0.99  |       |       |
|-----|-----|------|-------|-------|-------|-------|-------|-------|-------|-------|-------|
|     |     |      | Sol4  | Sol5  | Sol6  | Sol4  | Sol5  | Sol6  | Sol4  | Sol5  | Sol6  |
| 7   | 1   | 10   | 0.240 | 0.288 | 0.359 | 0.296 | 0.336 | 0.401 | 0.441 | 0.466 | 0.506 |
| 7   | 1   | 20   | 0.323 | 0.435 | 0.719 | 0.393 | 0.492 | 0.764 | 0.518 | 0.604 | 0.820 |
| 7   | 1   | 50   | 0.492 | 0.689 | 0.957 | 0.568 | 0.770 | 0.977 | 0.724 | 0.878 | 0.994 |
| 7   | 1   | 100  | 0.668 | 0.874 | 0.999 | 0.751 | 0.927 | 1.000 | 0.883 | 0.982 | 1.000 |
| 7   | 1   | 200  | 0.810 | 0.962 | 1.000 | 0.886 | 0.987 | 1.000 | 0.963 | 0.999 | 1.000 |
| 7   | 1   | 300  | 0.863 | 0.976 | 1.000 | 0.919 | 0.992 | 1.000 | 0.977 | 1.000 | 1.000 |
| 7   | 1   | 500  | 0.873 | 0.972 | 0.999 | 0.922 | 0.989 | 1.000 | 0.979 | 1.000 | 1.000 |
| 7   | 1   | 1000 | 0.838 | 0.944 | 0.989 | 0.896 | 0.974 | 0.998 | 0.964 | 0.994 | 1.000 |

**Table A.3:** Simple Mean Efficiency and Bias using VRS-DEA Estimator

| Panel A: Without Data Sharpening |     |      |               |             |                           |         |        |
|----------------------------------|-----|------|---------------|-------------|---------------------------|---------|--------|
| $p$                              | $q$ | $n$  | $\hat{\mu}_n$ | $\hat{B}_n$ | $\hat{\mu}_n - \hat{B}_n$ | $\mu_s$ | $\mu$  |
| 1                                | 1   | 10   | 1.3842        | -0.2451     | 1.6293                    | 1.8065  | 1.7979 |
| 1                                | 1   | 20   | 1.5007        | -0.2025     | 1.7032                    | 1.7965  | 1.7979 |
| 1                                | 1   | 50   | 1.6200        | -0.1443     | 1.7642                    | 1.8014  | 1.7979 |
| 1                                | 1   | 100  | 1.6745        | -0.1018     | 1.7762                    | 1.7956  | 1.7979 |
| 1                                | 1   | 200  | 1.7183        | -0.0709     | 1.7892                    | 1.7982  | 1.7979 |
| 1                                | 1   | 300  | 1.7345        | -0.0563     | 1.7908                    | 1.7969  | 1.7979 |
| 1                                | 1   | 500  | 1.7525        | -0.0421     | 1.7946                    | 1.7981  | 1.7979 |
| 1                                | 1   | 1000 | 1.7682        | -0.0276     | 1.7958                    | 1.7974  | 1.7979 |

  

| Panel B: With Data Sharpening |     |      |               |             |                           |         |        |
|-------------------------------|-----|------|---------------|-------------|---------------------------|---------|--------|
| $p$                           | $q$ | $n$  | $\hat{\mu}_n$ | $\hat{B}_n$ | $\hat{\mu}_n - \hat{B}_n$ | $\mu_s$ | $\mu$  |
| 1                             | 1   | 10   | 1.4806        | -0.2508     | 1.7314                    | 1.8065  | 1.7979 |
| 1                             | 1   | 20   | 1.5475        | -0.2045     | 1.7520                    | 1.7965  | 1.7979 |
| 1                             | 1   | 50   | 1.6368        | -0.1447     | 1.7815                    | 1.8014  | 1.7979 |
| 1                             | 1   | 100  | 1.6824        | -0.1019     | 1.7843                    | 1.7956  | 1.7979 |
| 1                             | 1   | 200  | 1.7220        | -0.0710     | 1.7929                    | 1.7982  | 1.7979 |
| 1                             | 1   | 300  | 1.7368        | -0.0564     | 1.7932                    | 1.7969  | 1.7979 |
| 1                             | 1   | 500  | 1.7539        | -0.0421     | 1.7960                    | 1.7981  | 1.7979 |
| 1                             | 1   | 1000 | 1.7688        | -0.0276     | 1.7964                    | 1.7974  | 1.7979 |

**NOTE:**  $\hat{\mu}_n$ : Mean efficiency constructed using  $n$  observations;  $\hat{B}_n$ : Bias constructed using  $n$  observations;  $\mu_s$ : Sample mean of true efficiency;  $\mu$ : Population mean of true efficiency.

**Table A.3:** Simple Mean Efficiency and Bias using VRS-DEA Estimator (continued)

| Panel A: Without Data Sharpening |     |      |               |             |                           |         |        |
|----------------------------------|-----|------|---------------|-------------|---------------------------|---------|--------|
| $p$                              | $q$ | $n$  | $\hat{\mu}_n$ | $\hat{B}_n$ | $\hat{\mu}_n - \hat{B}_n$ | $\mu_s$ | $\mu$  |
| 2                                | 1   | 10   | 1.2178        | -0.2600     | 1.4778                    | 1.8008  | 1.7979 |
| 2                                | 1   | 20   | 1.3300        | -0.2686     | 1.5986                    | 1.8005  | 1.7979 |
| 2                                | 1   | 50   | 1.4645        | -0.2365     | 1.7010                    | 1.7980  | 1.7979 |
| 2                                | 1   | 100  | 1.5489        | -0.1985     | 1.7474                    | 1.7992  | 1.7979 |
| 2                                | 1   | 200  | 1.6127        | -0.1578     | 1.7705                    | 1.7985  | 1.7979 |
| 2                                | 1   | 300  | 1.6424        | -0.1358     | 1.7782                    | 1.7969  | 1.7979 |
| 2                                | 1   | 500  | 1.6773        | -0.1116     | 1.7889                    | 1.7991  | 1.7979 |
| 2                                | 1   | 1000 | 1.7109        | -0.0825     | 1.7935                    | 1.7977  | 1.7979 |
| Panel B: With Data Sharpening    |     |      |               |             |                           |         |        |
| $p$                              | $q$ | $n$  | $\hat{\mu}_n$ | $\hat{B}_n$ | $\hat{\mu}_n - \hat{B}_n$ | $\mu_s$ | $\mu$  |
| 2                                | 1   | 10   | 1.3961        | -0.2752     | 1.6713                    | 1.8008  | 1.7979 |
| 2                                | 1   | 20   | 1.4393        | -0.2765     | 1.7158                    | 1.8005  | 1.7979 |
| 2                                | 1   | 50   | 1.5172        | -0.2395     | 1.7567                    | 1.7980  | 1.7979 |
| 2                                | 1   | 100  | 1.5783        | -0.1997     | 1.7780                    | 1.7992  | 1.7979 |
| 2                                | 1   | 200  | 1.6291        | -0.1584     | 1.7875                    | 1.7985  | 1.7979 |
| 2                                | 1   | 300  | 1.6540        | -0.1362     | 1.7902                    | 1.7969  | 1.7979 |
| 2                                | 1   | 500  | 1.6849        | -0.1118     | 1.7967                    | 1.7991  | 1.7979 |
| 2                                | 1   | 1000 | 1.7152        | -0.0826     | 1.7977                    | 1.7977  | 1.7979 |

**NOTE:**  $\hat{\mu}_n$ : Mean efficiency constructed using  $n$  observations;  $\hat{B}_n$ : Bias constructed using  $n$  observations;  $\mu_s$ : Sample mean of true efficiency;  $\mu$ : Population mean of true efficiency.

**Table A.3:** Simple Mean Efficiency and Bias using VRS-DEA Estimator (continued)

Panel A: Without Data Sharpening

| $p$ | $q$ | $n$  | $\hat{\mu}_{n_\kappa}$ | $\hat{B}_n$ | $\hat{\mu}_{n_\kappa} - \hat{B}_n$ | $\mu_s$ | $\mu$  |
|-----|-----|------|------------------------|-------------|------------------------------------|---------|--------|
| 3   | 1   | 10   | 1.1287                 | -0.2303     | 1.3590                             | 1.8022  | 1.7979 |
| 3   | 1   | 20   | 1.2165                 | -0.2841     | 1.5005                             | 1.7961  | 1.7979 |
| 3   | 1   | 50   | 1.3423                 | -0.2985     | 1.6408                             | 1.8005  | 1.7979 |
| 3   | 1   | 100  | 1.4341                 | -0.2723     | 1.7064                             | 1.7964  | 1.7979 |
| 3   | 1   | 200  | 1.5097                 | -0.2393     | 1.7490                             | 1.7970  | 1.7979 |
| 3   | 1   | 300  | 1.5493                 | -0.2162     | 1.7655                             | 1.7972  | 1.7979 |
| 3   | 1   | 500  | 1.5929                 | -0.1885     | 1.7814                             | 1.7990  | 1.7979 |
| 3   | 1   | 1000 | 1.6388                 | -0.1516     | 1.7904                             | 1.7978  | 1.7979 |

Panel B: With Data Sharpening

| $p$ | $q$ | $n$  | $\hat{\mu}_{n_\kappa}$ | $\hat{B}_n$ | $\hat{\mu}_{n_\kappa} - \hat{B}_n$ | $\mu_s$ | $\mu$  |
|-----|-----|------|------------------------|-------------|------------------------------------|---------|--------|
| 3   | 1   | 10   | 1.3608                 | -0.2529     | 1.6137                             | 1.8022  | 1.7979 |
| 3   | 1   | 20   | 1.3858                 | -0.3004     | 1.6863                             | 1.7961  | 1.7979 |
| 3   | 1   | 50   | 1.4414                 | -0.3069     | 1.7483                             | 1.8005  | 1.7979 |
| 3   | 1   | 100  | 1.4976                 | -0.2769     | 1.7744                             | 1.7964  | 1.7979 |
| 3   | 1   | 200  | 1.5494                 | -0.2417     | 1.7911                             | 1.7970  | 1.7979 |
| 3   | 1   | 300  | 1.5795                 | -0.2178     | 1.7973                             | 1.7972  | 1.7979 |
| 3   | 1   | 500  | 1.6140                 | -0.1895     | 1.8035                             | 1.7990  | 1.7979 |
| 3   | 1   | 1000 | 1.6520                 | -0.1521     | 1.8040                             | 1.7978  | 1.7979 |

**NOTE:**  $\hat{\mu}_{n_\kappa}$ : Mean efficiency constructed using  $n_\kappa$  observations where  $n_\kappa = \lfloor n^{2\kappa} \rfloor$ ;  $\hat{B}_n$ : Bias constructed using  $n$  observations;  $\mu_s$ : Sample mean of true efficiency;  $\mu$ : Population mean of true efficiency.

**Table A.3:** Simple Mean Efficiency and Bias using VRS-DEA Estimator (continued)

Panel A: Without Data Sharpening

| $p$ | $q$ | $n$  | $\hat{\mu}_{n_\kappa}$ | $\hat{B}_n$ | $\hat{\mu}_{n_\kappa} - \hat{B}_n$ | $\mu_s$ | $\mu$  |
|-----|-----|------|------------------------|-------------|------------------------------------|---------|--------|
| 4   | 1   | 10   | 1.0681                 | -0.1741     | 1.2421                             | 1.8001  | 1.7979 |
| 4   | 1   | 20   | 1.1335                 | -0.2490     | 1.3825                             | 1.7939  | 1.7979 |
| 4   | 1   | 50   | 1.2414                 | -0.3119     | 1.5533                             | 1.8033  | 1.7979 |
| 4   | 1   | 100  | 1.3202                 | -0.3191     | 1.6393                             | 1.7972  | 1.7979 |
| 4   | 1   | 200  | 1.3987                 | -0.3046     | 1.7033                             | 1.7990  | 1.7979 |
| 4   | 1   | 300  | 1.4424                 | -0.2894     | 1.7318                             | 1.7978  | 1.7979 |
| 4   | 1   | 500  | 1.4908                 | -0.2657     | 1.7565                             | 1.7984  | 1.7979 |
| 4   | 1   | 1000 | 1.5498                 | -0.2289     | 1.7787                             | 1.7973  | 1.7979 |

Panel B: With Data Sharpening

| $p$ | $q$ | $n$  | $\hat{\mu}_{n_\kappa}$ | $\hat{B}_n$ | $\hat{\mu}_{n_\kappa} - \hat{B}_n$ | $\mu_s$ | $\mu$  |
|-----|-----|------|------------------------|-------------|------------------------------------|---------|--------|
| 4   | 1   | 10   | 1.3464                 | -0.1989     | 1.5453                             | 1.8001  | 1.7979 |
| 4   | 1   | 20   | 1.3551                 | -0.2724     | 1.6275                             | 1.7939  | 1.7979 |
| 4   | 1   | 50   | 1.3900                 | -0.3277     | 1.7176                             | 1.8033  | 1.7979 |
| 4   | 1   | 100  | 1.4265                 | -0.3296     | 1.7562                             | 1.7972  | 1.7979 |
| 4   | 1   | 200  | 1.4719                 | -0.3111     | 1.7830                             | 1.7990  | 1.7979 |
| 4   | 1   | 300  | 1.5004                 | -0.2942     | 1.7946                             | 1.7978  | 1.7979 |
| 4   | 1   | 500  | 1.5345                 | -0.2689     | 1.8035                             | 1.7984  | 1.7979 |
| 4   | 1   | 1000 | 1.5789                 | -0.2307     | 1.8096                             | 1.7973  | 1.7979 |

**NOTE:**  $\hat{\mu}_{n_\kappa}$ : Mean efficiency constructed using  $n_\kappa$  observations where  $n_\kappa = \lfloor n^{2\kappa} \rfloor$ ;  $\hat{B}_n$ : Bias constructed using  $n$  observations;  $\mu_s$ : Sample mean of true efficiency;  $\mu$ : Population mean of true efficiency.



**Table A.3:** Simple Mean Efficiency and Bias using VRS-DEA Estimator (continued)

Panel A: Without Data Sharpening

| $p$ | $q$ | $n$  | $\hat{\mu}_{n_\kappa}$ | $\hat{B}_n$ | $\hat{\mu}_{n_\kappa} - \hat{B}_n$ | $\mu_s$ | $\mu$  |
|-----|-----|------|------------------------|-------------|------------------------------------|---------|--------|
| 5   | 1   | 10   | 1.0382                 | -0.1248     | 1.1630                             | 1.7995  | 1.7979 |
| 5   | 1   | 20   | 1.0892                 | -0.2140     | 1.3033                             | 1.7972  | 1.7979 |
| 5   | 1   | 50   | 1.1690                 | -0.2988     | 1.4678                             | 1.7982  | 1.7979 |
| 5   | 1   | 100  | 1.2462                 | -0.3383     | 1.5845                             | 1.7972  | 1.7979 |
| 5   | 1   | 200  | 1.3193                 | -0.3417     | 1.6610                             | 1.7960  | 1.7979 |
| 5   | 1   | 300  | 1.3640                 | -0.3385     | 1.7025                             | 1.7981  | 1.7979 |
| 5   | 1   | 500  | 1.4126                 | -0.3229     | 1.7354                             | 1.7974  | 1.7979 |
| 5   | 1   | 1000 | 1.4792                 | -0.2931     | 1.7724                             | 1.7981  | 1.7979 |

Panel B: With Data Sharpening

| $p$ | $q$ | $n$  | $\hat{\mu}_{n_\kappa}$ | $\hat{B}_n$ | $\hat{\mu}_{n_\kappa} - \hat{B}_n$ | $\mu_s$ | $\mu$  |
|-----|-----|------|------------------------|-------------|------------------------------------|---------|--------|
| 5   | 1   | 10   | 1.3450                 | -0.1475     | 1.4925                             | 1.7995  | 1.7979 |
| 5   | 1   | 20   | 1.3419                 | -0.2411     | 1.5830                             | 1.7972  | 1.7979 |
| 5   | 1   | 50   | 1.3601                 | -0.3219     | 1.6819                             | 1.7982  | 1.7979 |
| 5   | 1   | 100  | 1.3928                 | -0.3560     | 1.7488                             | 1.7972  | 1.7979 |
| 5   | 1   | 200  | 1.4269                 | -0.3540     | 1.7809                             | 1.7960  | 1.7979 |
| 5   | 1   | 300  | 1.4539                 | -0.3482     | 1.8022                             | 1.7981  | 1.7979 |
| 5   | 1   | 500  | 1.4829                 | -0.3299     | 1.8127                             | 1.7974  | 1.7979 |
| 5   | 1   | 1000 | 1.5294                 | -0.2975     | 1.8269                             | 1.7981  | 1.7979 |

**NOTE:**  $\hat{\mu}_{n_\kappa}$ : Mean efficiency constructed using  $n_\kappa$  observations where  $n_\kappa = \lfloor n^{2\kappa} \rfloor$ ;  $\hat{B}_n$ : Bias constructed using  $n$  observations;  $\mu_s$ : Sample mean of true efficiency;  $\mu$ : Population mean of true efficiency.

**Table A.3:** Simple Mean Efficiency and Bias using VRS-DEA Estimator (continued)

Panel A: Without Data Sharpening

| $p$ | $q$ | $n$  | $\hat{\mu}_{n_\kappa}$ | $\hat{B}_n$ | $\hat{\mu}_{n_\kappa} - \hat{B}_n$ | $\mu_s$ | $\mu$  |
|-----|-----|------|------------------------|-------------|------------------------------------|---------|--------|
| 7   | 1   | 10   | 1.0159                 | -0.0717     | 1.0877                             | 1.8017  | 1.7979 |
| 7   | 1   | 20   | 1.0397                 | -0.1448     | 1.1844                             | 1.8001  | 1.7979 |
| 7   | 1   | 50   | 1.0964                 | -0.2558     | 1.3522                             | 1.7971  | 1.7979 |
| 7   | 1   | 100  | 1.1496                 | -0.3201     | 1.4696                             | 1.7950  | 1.7979 |
| 7   | 1   | 200  | 1.2056                 | -0.3641     | 1.5697                             | 1.7974  | 1.7979 |
| 7   | 1   | 300  | 1.2482                 | -0.3809     | 1.6291                             | 1.7980  | 1.7979 |
| 7   | 1   | 500  | 1.2909                 | -0.3877     | 1.6786                             | 1.7976  | 1.7979 |
| 7   | 1   | 1000 | 1.3542                 | -0.3807     | 1.7349                             | 1.7972  | 1.7979 |

Panel B: With Data Sharpening

| $p$ | $q$ | $n$  | $\hat{\mu}_{n_\kappa}$ | $\hat{B}_n$ | $\hat{\mu}_{n_\kappa} - \hat{B}_n$ | $\mu_s$ | $\mu$  |
|-----|-----|------|------------------------|-------------|------------------------------------|---------|--------|
| 7   | 1   | 10   | 1.3541                 | -0.0884     | 1.4425                             | 1.8017  | 1.7979 |
| 7   | 1   | 20   | 1.3448                 | -0.1718     | 1.5167                             | 1.8001  | 1.7979 |
| 7   | 1   | 50   | 1.3494                 | -0.2884     | 1.6377                             | 1.7971  | 1.7979 |
| 7   | 1   | 100  | 1.3619                 | -0.3510     | 1.7129                             | 1.7950  | 1.7979 |
| 7   | 1   | 200  | 1.3799                 | -0.3902     | 1.7702                             | 1.7974  | 1.7979 |
| 7   | 1   | 300  | 1.4003                 | -0.4037     | 1.8040                             | 1.7980  | 1.7979 |
| 7   | 1   | 500  | 1.4212                 | -0.4065     | 1.8277                             | 1.7976  | 1.7979 |
| 7   | 1   | 1000 | 1.4550                 | -0.3944     | 1.8494                             | 1.7972  | 1.7979 |

**NOTE:**  $\hat{\mu}_{n_\kappa}$ : Mean efficiency constructed using  $n_\kappa$  observations where  $n_\kappa = \lfloor n^{2\kappa} \rfloor$ ;  $\hat{B}_n$ : Bias constructed using  $n$  observation;  $\mu_s$ : Sample mean of true efficiency;  $\mu$ : Population mean of true efficiency.

**Table A.4:** Mean Standard Deviation of Estimated Efficiency using VRS-DEA Estimator

| $p$ | $q$ | $n$  | Sol1   | Sol2   | Sol3   | Sol4   | Sol5   | Sol6   | $\sigma_s$ | $\sigma$ |
|-----|-----|------|--------|--------|--------|--------|--------|--------|------------|----------|
| 1   | 1   | 10   | 0.4459 | 0.5154 | 0.6867 | 0.3899 | 0.4712 | 0.6268 | 0.5841     | 0.6028   |
| 1   | 1   | 20   | 0.5052 | 0.5485 | 0.6576 | 0.4671 | 0.5143 | 0.6165 | 0.5941     | 0.6028   |
| 1   | 1   | 50   | 0.5510 | 0.5710 | 0.6345 | 0.5340 | 0.5548 | 0.6164 | 0.6007     | 0.6028   |
| 1   | 1   | 100  | 0.5678 | 0.5774 | 0.6186 | 0.5591 | 0.5689 | 0.6095 | 0.6005     | 0.6028   |
| 1   | 1   | 200  | 0.5814 | 0.5859 | 0.6130 | 0.5771 | 0.5816 | 0.6085 | 0.6029     | 0.6028   |
| 1   | 1   | 300  | 0.5854 | 0.5883 | 0.6091 | 0.5826 | 0.5854 | 0.6062 | 0.6022     | 0.6028   |
| 1   | 1   | 500  | 0.5900 | 0.5916 | 0.6070 | 0.5884 | 0.5899 | 0.6053 | 0.6026     | 0.6028   |
| 1   | 1   | 1000 | 0.5942 | 0.5949 | 0.6047 | 0.5934 | 0.5941 | 0.6039 | 0.6024     | 0.6028   |

**NOTE:**  $\sigma_s$ : Sample standard deviation of true efficiency;  $\sigma$ : Population standard deviation of true efficiency.

**Table A.4:** Mean Standard Deviation of Estimated Efficiency using VRS-DEA Estimator  
(continued)

| $p$ | $q$ | $n$  | Sol1   | Sol2   | Sol3   | Sol4   | Sol5   | Sol6   | $\sigma_s$ | $\sigma$ |
|-----|-----|------|--------|--------|--------|--------|--------|--------|------------|----------|
| 2   | 1   | 10   | 0.3354 | 0.4310 | 0.7017 | 0.2994 | 0.4146 | 0.6638 | 0.5794     | 0.6028   |
| 2   | 1   | 20   | 0.4282 | 0.5101 | 0.7229 | 0.3731 | 0.4696 | 0.6639 | 0.5956     | 0.6028   |
| 2   | 1   | 50   | 0.4968 | 0.5525 | 0.6895 | 0.4572 | 0.5185 | 0.6465 | 0.5976     | 0.6028   |
| 2   | 1   | 100  | 0.5309 | 0.5678 | 0.6664 | 0.5048 | 0.5440 | 0.6381 | 0.6011     | 0.6028   |
| 2   | 1   | 200  | 0.5520 | 0.5746 | 0.6445 | 0.5357 | 0.5591 | 0.6270 | 0.6022     | 0.6028   |
| 2   | 1   | 300  | 0.5605 | 0.5770 | 0.6345 | 0.5483 | 0.5652 | 0.6216 | 0.6018     | 0.6028   |
| 2   | 1   | 500  | 0.5704 | 0.5813 | 0.6260 | 0.5621 | 0.5732 | 0.6172 | 0.6028     | 0.6028   |
| 2   | 1   | 1000 | 0.5794 | 0.5852 | 0.6168 | 0.5745 | 0.5804 | 0.6117 | 0.6026     | 0.6028   |

**NOTE:**  $\sigma_s$ : Sample standard deviation of true efficiency;  $\sigma$ : Population standard deviation of true efficiency.

**Table A.4:** Mean Standard Deviation of Estimated Efficiency using VRS-DEA Estimator  
(continued)

| $p$ | $q$ | $n$  | Sol1   | Sol2   | Sol3   | Sol4   | Sol5   | Sol6   | $\sigma_s$ | $\sigma$ |
|-----|-----|------|--------|--------|--------|--------|--------|--------|------------|----------|
| 3   | 1   | 10   | 0.2455 | 0.3423 | 0.6674 | 0.2584 | 0.3712 | 0.6836 | 0.5861     | 0.6028   |
| 3   | 1   | 20   | 0.3474 | 0.4538 | 0.7551 | 0.3057 | 0.4341 | 0.7129 | 0.5916     | 0.6028   |
| 3   | 1   | 50   | 0.4425 | 0.5366 | 0.7622 | 0.3898 | 0.4992 | 0.7067 | 0.6012     | 0.6028   |
| 3   | 1   | 100  | 0.4863 | 0.5587 | 0.7269 | 0.4426 | 0.5235 | 0.6800 | 0.5998     | 0.6028   |
| 3   | 1   | 200  | 0.5179 | 0.5712 | 0.6977 | 0.4855 | 0.5430 | 0.6627 | 0.6008     | 0.6028   |
| 3   | 1   | 300  | 0.5324 | 0.5750 | 0.6802 | 0.5058 | 0.5512 | 0.6515 | 0.6020     | 0.6028   |
| 3   | 1   | 500  | 0.5464 | 0.5782 | 0.6633 | 0.5262 | 0.5596 | 0.6416 | 0.6028     | 0.6028   |
| 3   | 1   | 1000 | 0.5599 | 0.5802 | 0.6436 | 0.5464 | 0.5673 | 0.6292 | 0.6024     | 0.6028   |

**NOTE:**  $\sigma_s$ : Sample standard deviation of true efficiency;  $\sigma$ : Population standard deviation of true efficiency.

**Table A.4:** Mean Standard Deviation of Estimated Efficiency using VRS-DEA Estimator  
(continued)

| $p$ | $q$ | $n$  | Sol1   | Sol2   | Sol3   | Sol4   | Sol5   | Sol6   | $\sigma_s$ | $\sigma$ |
|-----|-----|------|--------|--------|--------|--------|--------|--------|------------|----------|
| 4   | 1   | 10   | 0.1608 | 0.2407 | 0.5512 | 0.2320 | 0.3203 | 0.6327 | 0.5823     | 0.6028   |
| 4   | 1   | 20   | 0.2620 | 0.3658 | 0.7257 | 0.2582 | 0.3808 | 0.7273 | 0.5888     | 0.6028   |
| 4   | 1   | 50   | 0.3733 | 0.4889 | 0.7979 | 0.3247 | 0.4640 | 0.7502 | 0.6010     | 0.6028   |
| 4   | 1   | 100  | 0.4295 | 0.5367 | 0.7863 | 0.3772 | 0.5028 | 0.7325 | 0.6007     | 0.6028   |
| 4   | 1   | 200  | 0.4710 | 0.5617 | 0.7556 | 0.4246 | 0.5272 | 0.7064 | 0.6017     | 0.6028   |
| 4   | 1   | 300  | 0.4913 | 0.5708 | 0.7385 | 0.4502 | 0.5384 | 0.6945 | 0.6029     | 0.6028   |
| 4   | 1   | 500  | 0.5122 | 0.5773 | 0.7155 | 0.4779 | 0.5487 | 0.6785 | 0.6032     | 0.6028   |
| 4   | 1   | 1000 | 0.5320 | 0.5793 | 0.6854 | 0.5063 | 0.5565 | 0.6576 | 0.6023     | 0.6028   |

**NOTE:**  $\sigma_s$ : Sample standard deviation of true efficiency;  $\sigma$ : Population standard deviation of true efficiency.

**Table A.4:** Mean Standard Deviation of Estimated Efficiency using VRS-DEA Estimator  
(continued)

| $p$ | $q$ | $n$  | Sol1   | Sol2   | Sol3   | Sol4   | Sol5   | Sol6   | $\sigma_s$ | $\sigma$ |
|-----|-----|------|--------|--------|--------|--------|--------|--------|------------|----------|
| 5   | 1   | 10   | 0.1012 | 0.1626 | 0.4212 | 0.2171 | 0.2817 | 0.5528 | 0.5883     | 0.6028   |
| 5   | 1   | 20   | 0.2060 | 0.3014 | 0.6920 | 0.2383 | 0.3461 | 0.7335 | 0.5918     | 0.6028   |
| 5   | 1   | 50   | 0.3147 | 0.4368 | 0.8146 | 0.2846 | 0.4326 | 0.7918 | 0.5993     | 0.6028   |
| 5   | 1   | 100  | 0.3809 | 0.5111 | 0.8382 | 0.3314 | 0.4881 | 0.7923 | 0.5994     | 0.6028   |
| 5   | 1   | 200  | 0.4302 | 0.5503 | 0.8167 | 0.3774 | 0.5185 | 0.7643 | 0.6015     | 0.6028   |
| 5   | 1   | 300  | 0.4552 | 0.5679 | 0.8024 | 0.4047 | 0.5346 | 0.7509 | 0.6024     | 0.6028   |
| 5   | 1   | 500  | 0.4791 | 0.5781 | 0.7757 | 0.4332 | 0.5449 | 0.7278 | 0.6020     | 0.6028   |
| 5   | 1   | 1000 | 0.5068 | 0.5856 | 0.7412 | 0.4689 | 0.5556 | 0.7010 | 0.6028     | 0.6028   |

**NOTE:**  $\sigma_s$ : Sample standard deviation of true efficiency;  $\sigma$ : Population standard deviation of true efficiency.

**Table A.4:** Mean Standard Deviation of Estimated Efficiency using VRS-DEA Estimator  
(continued)

| $p$ | $q$ | $n$  | Sol1   | Sol2   | Sol3   | Sol4   | Sol5   | Sol6   | $\sigma_s$ | $\sigma$ |
|-----|-----|------|--------|--------|--------|--------|--------|--------|------------|----------|
| 7   | 1   | 10   | 0.0475 | 0.0869 | 0.2562 | 0.2128 | 0.2524 | 0.4396 | 0.5841     | 0.6028   |
| 7   | 1   | 20   | 0.1246 | 0.1944 | 0.5560 | 0.2212 | 0.2925 | 0.6692 | 0.5900     | 0.6028   |
| 7   | 1   | 50   | 0.2328 | 0.3490 | 0.8167 | 0.2492 | 0.3847 | 0.8558 | 0.5990     | 0.6028   |
| 7   | 1   | 100  | 0.2985 | 0.4396 | 0.8915 | 0.2778 | 0.4495 | 0.8913 | 0.5987     | 0.6028   |
| 7   | 1   | 200  | 0.3568 | 0.5109 | 0.9111 | 0.3140 | 0.5019 | 0.8827 | 0.6006     | 0.6028   |
| 7   | 1   | 300  | 0.3870 | 0.5437 | 0.9157 | 0.3369 | 0.5265 | 0.8765 | 0.6032     | 0.6028   |
| 7   | 1   | 500  | 0.4175 | 0.5702 | 0.8972 | 0.3635 | 0.5457 | 0.8504 | 0.6017     | 0.6028   |
| 7   | 1   | 1000 | 0.4536 | 0.5924 | 0.8615 | 0.4001 | 0.5620 | 0.8111 | 0.6018     | 0.6028   |

**NOTE:**  $\sigma_s$ : Sample standard deviation of true efficiency;  $\sigma$ : Population standard deviation of true efficiency.



## Appendix B Details and Additional Results from Simulations for FDH Estimator

In this appendix, we conduct extensive Monte-Carlo experiments to illustrate the performance of our proposed method for FDH estimator. The technology and data generation process are the same as for VRS-DEA estimator presented in Appendix A. Instead of using VRS-DEA estimator, here we use FDH estimator. Note that in this situation, according to [Kneip et al. \(2015\)](#), FDH estimator is also consistent but with a slower convergence rate compared to VRS-DEA estimator.

Tables [B.5–B.7](#) present additional results not shown in the paper. Table [B.5](#) presents the coverages of estimated confidence intervals for the simple mean efficiency using FDH estimator across different sample sizes and dimensions. Table [B.6](#) presents simple mean efficiency estimates and bias using FDH estimator, while Table [B.7](#) presents mean standard deviation of estimated efficiency using FDH estimator.

**Table B.5:** Empirical Coverages for the Simple Mean Efficiency using FDH Estimator

| Panel A: Without Data Sharpening |     |      |       |       |       |       |       |       |       |       |       |  |
|----------------------------------|-----|------|-------|-------|-------|-------|-------|-------|-------|-------|-------|--|
| $p$                              | $q$ | $n$  | 0.90  |       |       | 0.95  |       |       | 0.99  |       |       |  |
|                                  |     |      | Sol1  | Sol2  | Sol3  | Sol1  | Sol2  | Sol3  | Sol1  | Sol2  | Sol3  |  |
| 1                                | 1   | 10   | 0.286 | 0.338 | 0.482 | 0.331 | 0.387 | 0.540 | 0.414 | 0.481 | 0.651 |  |
| 1                                | 1   | 20   | 0.369 | 0.416 | 0.551 | 0.430 | 0.488 | 0.642 | 0.553 | 0.619 | 0.773 |  |
| 1                                | 1   | 50   | 0.460 | 0.502 | 0.614 | 0.546 | 0.594 | 0.710 | 0.690 | 0.736 | 0.839 |  |
| 1                                | 1   | 100  | 0.546 | 0.583 | 0.665 | 0.644 | 0.669 | 0.750 | 0.783 | 0.808 | 0.877 |  |
| 1                                | 1   | 200  | 0.649 | 0.664 | 0.726 | 0.736 | 0.753 | 0.801 | 0.855 | 0.872 | 0.916 |  |
| 1                                | 1   | 300  | 0.680 | 0.694 | 0.742 | 0.767 | 0.778 | 0.821 | 0.887 | 0.895 | 0.923 |  |
| 1                                | 1   | 500  | 0.724 | 0.734 | 0.767 | 0.809 | 0.819 | 0.847 | 0.920 | 0.926 | 0.947 |  |
| 1                                | 1   | 1000 | 0.782 | 0.789 | 0.810 | 0.863 | 0.865 | 0.888 | 0.948 | 0.948 | 0.961 |  |

  

| Panel B: With Data Sharpening |     |      |       |       |       |       |       |       |       |       |       |  |
|-------------------------------|-----|------|-------|-------|-------|-------|-------|-------|-------|-------|-------|--|
| $p$                           | $q$ | $n$  | 0.90  |       |       | 0.95  |       |       | 0.99  |       |       |  |
|                               |     |      | Sol4  | Sol5  | Sol6  | Sol4  | Sol5  | Sol6  | Sol4  | Sol5  | Sol6  |  |
| 1                             | 1   | 10   | 0.430 | 0.535 | 0.683 | 0.494 | 0.600 | 0.749 | 0.600 | 0.695 | 0.835 |  |
| 1                             | 1   | 20   | 0.519 | 0.599 | 0.727 | 0.588 | 0.670 | 0.792 | 0.702 | 0.771 | 0.877 |  |
| 1                             | 1   | 50   | 0.599 | 0.652 | 0.750 | 0.683 | 0.727 | 0.820 | 0.796 | 0.838 | 0.905 |  |
| 1                             | 1   | 100  | 0.645 | 0.679 | 0.766 | 0.743 | 0.773 | 0.842 | 0.855 | 0.881 | 0.935 |  |
| 1                             | 1   | 200  | 0.724 | 0.742 | 0.795 | 0.797 | 0.816 | 0.866 | 0.910 | 0.922 | 0.954 |  |
| 1                             | 1   | 300  | 0.737 | 0.754 | 0.798 | 0.820 | 0.834 | 0.872 | 0.917 | 0.927 | 0.953 |  |
| 1                             | 1   | 500  | 0.773 | 0.781 | 0.819 | 0.855 | 0.863 | 0.891 | 0.946 | 0.948 | 0.962 |  |
| 1                             | 1   | 1000 | 0.811 | 0.817 | 0.844 | 0.883 | 0.887 | 0.903 | 0.960 | 0.962 | 0.972 |  |

**Table B.5:** Empirical Coverages for the Simple Mean Efficiency using FDH Estimator  
(continued)

Panel A: Without Data Sharpening

| $p$ | $q$ | $n$  | 0.90  |       | 0.95  |       | 0.99  |       |       |       |
|-----|-----|------|-------|-------|-------|-------|-------|-------|-------|-------|
|     |     |      | Sol1  | Sol2  | Sol1  | Sol2  | Sol1  | Sol2  | Sol3  |       |
| 2   | 1   | 10   | 0.117 | 0.169 | 0.140 | 0.205 | 0.427 | 0.204 | 0.284 | 0.517 |
| 2   | 1   | 20   | 0.139 | 0.196 | 0.175 | 0.249 | 0.525 | 0.252 | 0.345 | 0.667 |
| 2   | 1   | 50   | 0.216 | 0.300 | 0.276 | 0.380 | 0.683 | 0.401 | 0.535 | 0.849 |
| 2   | 1   | 100  | 0.321 | 0.408 | 0.399 | 0.512 | 0.797 | 0.575 | 0.716 | 0.933 |
| 2   | 1   | 200  | 0.447 | 0.543 | 0.557 | 0.671 | 0.872 | 0.758 | 0.846 | 0.975 |
| 2   | 1   | 300  | 0.538 | 0.622 | 0.648 | 0.729 | 0.885 | 0.801 | 0.883 | 0.977 |
| 2   | 1   | 500  | 0.629 | 0.695 | 0.731 | 0.794 | 0.916 | 0.878 | 0.930 | 0.985 |
| 2   | 1   | 1000 | 0.724 | 0.765 | 0.817 | 0.866 | 0.941 | 0.945 | 0.964 | 0.991 |

Panel B: With Data Sharpening

| $p$ | $q$ | $n$  | 0.90  |       | 0.95  |       | 0.99  |       |       |       |
|-----|-----|------|-------|-------|-------|-------|-------|-------|-------|-------|
|     |     |      | Sol4  | Sol5  | Sol4  | Sol5  | Sol4  | Sol5  | Sol6  |       |
| 2   | 1   | 10   | 0.355 | 0.448 | 0.418 | 0.507 | 0.705 | 0.523 | 0.604 | 0.771 |
| 2   | 1   | 20   | 0.376 | 0.493 | 0.445 | 0.559 | 0.808 | 0.556 | 0.668 | 0.897 |
| 2   | 1   | 50   | 0.482 | 0.620 | 0.567 | 0.706 | 0.914 | 0.701 | 0.830 | 0.974 |
| 2   | 1   | 100  | 0.618 | 0.731 | 0.702 | 0.812 | 0.951 | 0.830 | 0.919 | 0.993 |
| 2   | 1   | 200  | 0.721 | 0.810 | 0.804 | 0.889 | 0.975 | 0.922 | 0.967 | 0.997 |
| 2   | 1   | 300  | 0.762 | 0.825 | 0.829 | 0.904 | 0.975 | 0.943 | 0.973 | 0.995 |
| 2   | 1   | 500  | 0.818 | 0.870 | 0.894 | 0.934 | 0.981 | 0.968 | 0.987 | 0.998 |
| 2   | 1   | 1000 | 0.853 | 0.891 | 0.923 | 0.951 | 0.985 | 0.985 | 0.991 | 0.998 |

**Table B.5:** Empirical Coverages for the Simple Mean Efficiency using FDH Estimator  
(continued)

Panel A: Without Data Sharpening

| $p$ | $q$ | $n$  | 0.90  |       |       | 0.95  |       |       | 0.99  |       |       |
|-----|-----|------|-------|-------|-------|-------|-------|-------|-------|-------|-------|
|     |     |      | Sol1  | Sol2  | Sol3  | Sol1  | Sol2  | Sol3  | Sol1  | Sol2  | Sol3  |
| 3   | 1   | 10   | 0.047 | 0.077 | 0.232 | 0.059 | 0.095 | 0.282 | 0.084 | 0.133 | 0.343 |
| 3   | 1   | 20   | 0.052 | 0.095 | 0.346 | 0.068 | 0.121 | 0.420 | 0.111 | 0.189 | 0.553 |
| 3   | 1   | 50   | 0.066 | 0.123 | 0.466 | 0.089 | 0.168 | 0.598 | 0.156 | 0.279 | 0.787 |
| 3   | 1   | 100  | 0.081 | 0.162 | 0.585 | 0.119 | 0.246 | 0.753 | 0.227 | 0.425 | 0.929 |
| 3   | 1   | 200  | 0.191 | 0.321 | 0.766 | 0.265 | 0.434 | 0.889 | 0.434 | 0.669 | 0.991 |
| 3   | 1   | 300  | 0.259 | 0.420 | 0.817 | 0.351 | 0.550 | 0.921 | 0.567 | 0.786 | 0.994 |
| 3   | 1   | 500  | 0.386 | 0.542 | 0.872 | 0.501 | 0.683 | 0.962 | 0.717 | 0.887 | 0.999 |
| 3   | 1   | 1000 | 0.557 | 0.702 | 0.921 | 0.683 | 0.822 | 0.979 | 0.866 | 0.958 | 1.000 |

Panel B: With Data Sharpening

| $p$ | $q$ | $n$  | 0.90  |       |       | 0.95  |       |       | 0.99  |       |       |
|-----|-----|------|-------|-------|-------|-------|-------|-------|-------|-------|-------|
|     |     |      | Sol4  | Sol5  | Sol6  | Sol4  | Sol5  | Sol6  | Sol4  | Sol5  | Sol6  |
| 3   | 1   | 10   | 0.269 | 0.321 | 0.467 | 0.319 | 0.368 | 0.504 | 0.416 | 0.460 | 0.569 |
| 3   | 1   | 20   | 0.288 | 0.390 | 0.688 | 0.357 | 0.457 | 0.746 | 0.479 | 0.562 | 0.826 |
| 3   | 1   | 50   | 0.346 | 0.505 | 0.874 | 0.424 | 0.591 | 0.931 | 0.566 | 0.740 | 0.981 |
| 3   | 1   | 100  | 0.433 | 0.645 | 0.948 | 0.538 | 0.750 | 0.981 | 0.701 | 0.884 | 0.997 |
| 3   | 1   | 200  | 0.601 | 0.810 | 0.989 | 0.704 | 0.894 | 0.996 | 0.873 | 0.976 | 1.000 |
| 3   | 1   | 300  | 0.695 | 0.859 | 0.992 | 0.794 | 0.930 | 0.999 | 0.911 | 0.987 | 1.000 |
| 3   | 1   | 500  | 0.784 | 0.921 | 0.995 | 0.870 | 0.972 | 1.000 | 0.969 | 0.997 | 1.000 |
| 3   | 1   | 1000 | 0.868 | 0.950 | 0.995 | 0.933 | 0.979 | 1.000 | 0.982 | 1.000 | 1.000 |

**Table B.5:** Empirical Coverages for the Simple Mean Efficiency using FDH Estimator  
(continued)

Panel A: Without Data Sharpening

| $p$ | $q$ | $n$  | 0.90  |       | 0.95  |       | 0.99  |       |       |       |       |
|-----|-----|------|-------|-------|-------|-------|-------|-------|-------|-------|-------|
|     |     |      | Sol1  | Sol2  | Sol3  | Sol1  | Sol2  | Sol3  | Sol1  | Sol2  | Sol3  |
| 4   | 1   | 10   | 0.022 | 0.036 | 0.113 | 0.026 | 0.046 | 0.130 | 0.036 | 0.065 | 0.159 |
| 4   | 1   | 20   | 0.013 | 0.024 | 0.153 | 0.017 | 0.029 | 0.200 | 0.025 | 0.049 | 0.275 |
| 4   | 1   | 50   | 0.013 | 0.021 | 0.276 | 0.015 | 0.035 | 0.381 | 0.027 | 0.069 | 0.575 |
| 4   | 1   | 100  | 0.009 | 0.023 | 0.333 | 0.013 | 0.037 | 0.483 | 0.029 | 0.088 | 0.764 |
| 4   | 1   | 200  | 0.011 | 0.035 | 0.454 | 0.018 | 0.054 | 0.673 | 0.044 | 0.142 | 0.929 |
| 4   | 1   | 300  | 0.024 | 0.062 | 0.598 | 0.036 | 0.113 | 0.824 | 0.090 | 0.267 | 0.985 |
| 4   | 1   | 500  | 0.042 | 0.108 | 0.684 | 0.070 | 0.172 | 0.891 | 0.147 | 0.396 | 0.998 |
| 4   | 1   | 1000 | 0.123 | 0.250 | 0.824 | 0.185 | 0.387 | 0.965 | 0.347 | 0.686 | 1.000 |

Panel B: With Data Sharpening

| $p$ | $q$ | $n$  | 0.90  |       | 0.95  |       | 0.99  |       |       |       |       |
|-----|-----|------|-------|-------|-------|-------|-------|-------|-------|-------|-------|
|     |     |      | Sol4  | Sol5  | Sol6  | Sol4  | Sol5  | Sol6  | Sol4  | Sol5  | Sol6  |
| 4   | 1   | 10   | 0.216 | 0.240 | 0.298 | 0.289 | 0.312 | 0.358 | 0.447 | 0.462 | 0.497 |
| 4   | 1   | 20   | 0.163 | 0.207 | 0.457 | 0.210 | 0.259 | 0.499 | 0.324 | 0.379 | 0.577 |
| 4   | 1   | 50   | 0.177 | 0.269 | 0.741 | 0.230 | 0.339 | 0.821 | 0.368 | 0.486 | 0.911 |
| 4   | 1   | 100  | 0.171 | 0.306 | 0.857 | 0.226 | 0.405 | 0.939 | 0.371 | 0.590 | 0.984 |
| 4   | 1   | 200  | 0.229 | 0.436 | 0.957 | 0.301 | 0.566 | 0.989 | 0.478 | 0.788 | 1.000 |
| 4   | 1   | 300  | 0.319 | 0.572 | 0.986 | 0.418 | 0.713 | 0.999 | 0.614 | 0.907 | 1.000 |
| 4   | 1   | 500  | 0.399 | 0.687 | 0.997 | 0.505 | 0.829 | 1.000 | 0.714 | 0.963 | 1.000 |
| 4   | 1   | 1000 | 0.600 | 0.859 | 1.000 | 0.722 | 0.947 | 1.000 | 0.890 | 0.997 | 1.000 |

**Table B.5:** Empirical Coverages for the Simple Mean Efficiency using FDH Estimator  
(continued)

| Panel A: Without Data Sharpening |     |      |       |       |       |       |       |       |       |       |       |  |
|----------------------------------|-----|------|-------|-------|-------|-------|-------|-------|-------|-------|-------|--|
| $p$                              | $q$ | $n$  | 0.90  |       |       | 0.95  |       |       | 0.99  |       |       |  |
|                                  |     |      | Sol1  | Sol2  | Sol3  | Sol1  | Sol2  | Sol3  | Sol1  | Sol2  | Sol3  |  |
| 5                                | 1   | 50   | 0.004 | 0.009 | 0.187 | 0.005 | 0.011 | 0.251 | 0.009 | 0.025 | 0.381 |  |
| 5                                | 1   | 100  | 0.002 | 0.003 | 0.212 | 0.002 | 0.005 | 0.364 | 0.004 | 0.017 | 0.607 |  |
| 5                                | 1   | 200  | 0.003 | 0.008 | 0.347 | 0.004 | 0.017 | 0.576 | 0.011 | 0.037 | 0.865 |  |
| 5                                | 1   | 300  | 0.004 | 0.013 | 0.418 | 0.006 | 0.020 | 0.686 | 0.014 | 0.055 | 0.951 |  |
| 5                                | 1   | 500  | 0.009 | 0.025 | 0.603 | 0.016 | 0.050 | 0.874 | 0.034 | 0.129 | 0.998 |  |
| 5                                | 1   | 1000 | 0.025 | 0.072 | 0.839 | 0.038 | 0.136 | 0.982 | 0.090 | 0.364 | 1.000 |  |

  

| Panel B: With Data Sharpening |     |      |       |       |       |       |       |       |       |       |       |  |
|-------------------------------|-----|------|-------|-------|-------|-------|-------|-------|-------|-------|-------|--|
| $p$                           | $q$ | $n$  | 0.90  |       |       | 0.95  |       |       | 0.99  |       |       |  |
|                               |     |      | Sol4  | Sol5  | Sol6  | Sol4  | Sol5  | Sol6  | Sol4  | Sol5  | Sol6  |  |
| 5                             | 1   | 50   | 0.120 | 0.165 | 0.606 | 0.164 | 0.229 | 0.669 | 0.303 | 0.385 | 0.772 |  |
| 5                             | 1   | 100  | 0.105 | 0.173 | 0.807 | 0.148 | 0.248 | 0.888 | 0.270 | 0.428 | 0.962 |  |
| 5                             | 1   | 200  | 0.124 | 0.264 | 0.938 | 0.180 | 0.380 | 0.981 | 0.341 | 0.608 | 0.998 |  |
| 5                             | 1   | 300  | 0.150 | 0.325 | 0.980 | 0.217 | 0.460 | 0.998 | 0.386 | 0.720 | 1.000 |  |
| 5                             | 1   | 500  | 0.228 | 0.493 | 0.997 | 0.307 | 0.663 | 1.000 | 0.521 | 0.890 | 1.000 |  |
| 5                             | 1   | 1000 | 0.397 | 0.767 | 1.000 | 0.522 | 0.887 | 1.000 | 0.751 | 0.985 | 1.000 |  |

**Table B.5:** Empirical Coverages for the Simple Mean Efficiency using FDH Estimator  
(continued)

| Panel A: Without Data Sharpening |     |      |       |       |       |       |       |       |       |       |       |  |
|----------------------------------|-----|------|-------|-------|-------|-------|-------|-------|-------|-------|-------|--|
| $p$                              | $q$ | $n$  | 0.90  |       |       | 0.95  |       |       | 0.99  |       |       |  |
|                                  |     |      | Sol1  | Sol2  | Sol3  | Sol1  | Sol2  | Sol3  | Sol1  | Sol2  | Sol3  |  |
| 7                                | 1   | 50   | 0.003 | 0.004 | 0.139 | 0.003 | 0.004 | 0.177 | 0.003 | 0.011 | 0.251 |  |
| 7                                | 1   | 100  | 0.001 | 0.002 | 0.149 | 0.001 | 0.003 | 0.234 | 0.001 | 0.005 | 0.370 |  |
| 7                                | 1   | 200  | 0.001 | 0.004 | 0.272 | 0.002 | 0.005 | 0.447 | 0.004 | 0.011 | 0.700 |  |
| 7                                | 1   | 300  | 0.001 | 0.002 | 0.264 | 0.001 | 0.003 | 0.475 | 0.002 | 0.006 | 0.800 |  |
| 7                                | 1   | 500  | 0.002 | 0.003 | 0.498 | 0.003 | 0.004 | 0.797 | 0.003 | 0.017 | 0.984 |  |
| 7                                | 1   | 1000 | 0.007 | 0.017 | 0.785 | 0.009 | 0.031 | 0.981 | 0.018 | 0.062 | 1.000 |  |

  

| Panel B: With Data Sharpening |     |      |       |       |       |       |       |       |       |       |       |  |
|-------------------------------|-----|------|-------|-------|-------|-------|-------|-------|-------|-------|-------|--|
| $p$                           | $q$ | $n$  | 0.90  |       |       | 0.95  |       |       | 0.99  |       |       |  |
|                               |     |      | Sol4  | Sol5  | Sol6  | Sol4  | Sol5  | Sol6  | Sol4  | Sol5  | Sol6  |  |
| 7                             | 1   | 50   | 0.174 | 0.200 | 0.472 | 0.256 | 0.287 | 0.539 | 0.445 | 0.476 | 0.661 |  |
| 7                             | 1   | 100  | 0.088 | 0.124 | 0.647 | 0.139 | 0.184 | 0.729 | 0.281 | 0.348 | 0.823 |  |
| 7                             | 1   | 200  | 0.133 | 0.206 | 0.898 | 0.201 | 0.298 | 0.953 | 0.369 | 0.517 | 0.987 |  |
| 7                             | 1   | 300  | 0.104 | 0.186 | 0.947 | 0.161 | 0.287 | 0.982 | 0.313 | 0.497 | 0.998 |  |
| 7                             | 1   | 500  | 0.163 | 0.308 | 0.997 | 0.233 | 0.451 | 1.000 | 0.423 | 0.713 | 1.000 |  |
| 7                             | 1   | 1000 | 0.239 | 0.525 | 1.000 | 0.333 | 0.700 | 1.000 | 0.565 | 0.915 | 1.000 |  |

**Table B.6:** Simple Mean Efficiency and Bias using FDH Estimator

Panel A: Without Data Sharpening

| $p$ | $q$ | $n$  | $\hat{\mu}_n$ | $\hat{B}_n$ | $\hat{\mu}_n - \hat{B}_n$ | $\mu_s$ | $\mu$  |
|-----|-----|------|---------------|-------------|---------------------------|---------|--------|
| 1   | 1   | 10   | 1.2474        | -0.2312     | 1.4787                    | 1.8009  | 1.7979 |
| 1   | 1   | 20   | 1.3494        | -0.2402     | 1.5896                    | 1.7994  | 1.7979 |
| 1   | 1   | 50   | 1.4675        | -0.2152     | 1.6828                    | 1.7966  | 1.7979 |
| 1   | 1   | 100  | 1.5447        | -0.1856     | 1.7302                    | 1.7956  | 1.7979 |
| 1   | 1   | 200  | 1.6084        | -0.1518     | 1.7602                    | 1.7967  | 1.7979 |
| 1   | 1   | 300  | 1.6395        | -0.1320     | 1.7716                    | 1.7982  | 1.7979 |
| 1   | 1   | 500  | 1.6708        | -0.1085     | 1.7793                    | 1.7972  | 1.7979 |
| 1   | 1   | 1000 | 1.7058        | -0.0823     | 1.7881                    | 1.7979  | 1.7979 |

Panel B: With Data Sharpening

| $p$ | $q$ | $n$  | $\hat{\mu}_n$ | $\hat{B}_n$ | $\hat{\mu}_n - \hat{B}_n$ | $\mu_s$ | $\mu$  |
|-----|-----|------|---------------|-------------|---------------------------|---------|--------|
| 1   | 1   | 10   | 1.4215        | -0.2439     | 1.6654                    | 1.8009  | 1.7979 |
| 1   | 1   | 20   | 1.4556        | -0.2467     | 1.7023                    | 1.7994  | 1.7979 |
| 1   | 1   | 50   | 1.5198        | -0.2176     | 1.7375                    | 1.7966  | 1.7979 |
| 1   | 1   | 100  | 1.5740        | -0.1866     | 1.7607                    | 1.7956  | 1.7979 |
| 1   | 1   | 200  | 1.6247        | -0.1523     | 1.7770                    | 1.7967  | 1.7979 |
| 1   | 1   | 300  | 1.6511        | -0.1323     | 1.7834                    | 1.7982  | 1.7979 |
| 1   | 1   | 500  | 1.6783        | -0.1087     | 1.7870                    | 1.7972  | 1.7979 |
| 1   | 1   | 1000 | 1.7100        | -0.0824     | 1.7924                    | 1.7979  | 1.7979 |

**NOTE:**  $\hat{\mu}_n$ : Mean efficiency constructed using  $n$  observations;  $\hat{B}_n$ : Bias constructed using  $n$  observations;  $\mu_s$ : Sample mean of true efficiency;  $\mu$ : Population mean of true efficiency.



**Table B.6:** Simple Mean Efficiency and Bias using FDH Estimator (continued)

Panel A: Without Data Sharpening

| $p$ | $q$ | $n$  | $\hat{\mu}_{n_k}$ | $\hat{B}_n$ | $\hat{\mu}_{n_k} - \hat{B}_n$ | $\mu_s$ | $\mu$  |
|-----|-----|------|-------------------|-------------|-------------------------------|---------|--------|
| 2   | 1   | 10   | 1.0936            | -0.1649     | 1.2584                        | 1.7933  | 1.7979 |
| 2   | 1   | 20   | 1.1459            | -0.2131     | 1.3590                        | 1.7986  | 1.7979 |
| 2   | 1   | 50   | 1.2380            | -0.2662     | 1.5042                        | 1.7975  | 1.7979 |
| 2   | 1   | 100  | 1.3107            | -0.2826     | 1.5933                        | 1.7992  | 1.7979 |
| 2   | 1   | 200  | 1.3867            | -0.2773     | 1.6640                        | 1.7986  | 1.7979 |
| 2   | 1   | 300  | 1.4225            | -0.2657     | 1.6881                        | 1.7973  | 1.7979 |
| 2   | 1   | 500  | 1.4703            | -0.2487     | 1.7190                        | 1.7980  | 1.7979 |
| 2   | 1   | 1000 | 1.5291            | -0.2205     | 1.7496                        | 1.7988  | 1.7979 |

Panel B: With Data Sharpening

| $p$ | $q$ | $n$  | $\hat{\mu}_{n_k}$ | $\hat{B}_n$ | $\hat{\mu}_{n_k} - \hat{B}_n$ | $\mu_s$ | $\mu$  |
|-----|-----|------|-------------------|-------------|-------------------------------|---------|--------|
| 2   | 1   | 10   | 1.3719            | -0.1859     | 1.5578                        | 1.7933  | 1.7979 |
| 2   | 1   | 20   | 1.3638            | -0.2319     | 1.5957                        | 1.7986  | 1.7979 |
| 2   | 1   | 50   | 1.3886            | -0.2789     | 1.6675                        | 1.7975  | 1.7979 |
| 2   | 1   | 100  | 1.4185            | -0.2910     | 1.7095                        | 1.7992  | 1.7979 |
| 2   | 1   | 200  | 1.4609            | -0.2824     | 1.7433                        | 1.7986  | 1.7979 |
| 2   | 1   | 300  | 1.4826            | -0.2695     | 1.7521                        | 1.7973  | 1.7979 |
| 2   | 1   | 500  | 1.5152            | -0.2513     | 1.7665                        | 1.7980  | 1.7979 |
| 2   | 1   | 1000 | 1.5592            | -0.2221     | 1.7813                        | 1.7988  | 1.7979 |

**NOTE:**  $\hat{\mu}_{n_k}$ : Mean efficiency constructed using  $n_k$  observations;  $\hat{B}_n$ : Bias constructed using  $n$  observations;  $\mu_s$ : Sample mean of true efficiency;  $\mu$ : Population mean of true efficiency.

**Table B.6:** Simple Mean Efficiency and Bias using FDH Estimator (continued)

Panel A: Without Data Sharpening

| $p$ | $q$ | $n$  | $\hat{\mu}_{n_k}$ | $\hat{B}_n$ | $\hat{\mu}_{n_k} - \hat{B}_n$ | $\mu_s$ | $\mu$  |
|-----|-----|------|-------------------|-------------|-------------------------------|---------|--------|
| 3   | 1   | 10   | 1.0357            | -0.0987     | 1.1344                        | 1.8014  | 1.7979 |
| 3   | 1   | 20   | 1.0644            | -0.1497     | 1.2141                        | 1.7985  | 1.7979 |
| 3   | 1   | 50   | 1.1198            | -0.2268     | 1.3466                        | 1.7956  | 1.7979 |
| 3   | 1   | 100  | 1.1677            | -0.2707     | 1.4384                        | 1.7967  | 1.7979 |
| 3   | 1   | 200  | 1.2314            | -0.3057     | 1.5370                        | 1.7994  | 1.7979 |
| 3   | 1   | 300  | 1.2633            | -0.3153     | 1.5786                        | 1.7978  | 1.7979 |
| 3   | 1   | 500  | 1.3092            | -0.3206     | 1.6298                        | 1.7977  | 1.7979 |
| 3   | 1   | 1000 | 1.3685            | -0.3148     | 1.6833                        | 1.7980  | 1.7979 |

Panel B: With Data Sharpening

| $p$ | $q$ | $n$  | $\hat{\mu}_{n_k}$ | $\hat{B}_n$ | $\hat{\mu}_{n_k} - \hat{B}_n$ | $\mu_s$ | $\mu$  |
|-----|-----|------|-------------------|-------------|-------------------------------|---------|--------|
| 3   | 1   | 10   | 1.3622            | -0.1184     | 1.4806                        | 1.8014  | 1.7979 |
| 3   | 1   | 20   | 1.3485            | -0.1711     | 1.5196                        | 1.7985  | 1.7979 |
| 3   | 1   | 50   | 1.3460            | -0.2488     | 1.5948                        | 1.7956  | 1.7979 |
| 3   | 1   | 100  | 1.3545            | -0.2899     | 1.6444                        | 1.7967  | 1.7979 |
| 3   | 1   | 200  | 1.3784            | -0.3209     | 1.6992                        | 1.7994  | 1.7979 |
| 3   | 1   | 300  | 1.3916            | -0.3282     | 1.7198                        | 1.7978  | 1.7979 |
| 3   | 1   | 500  | 1.4146            | -0.3308     | 1.7454                        | 1.7977  | 1.7979 |
| 3   | 1   | 1000 | 1.4483            | -0.3219     | 1.7702                        | 1.7980  | 1.7979 |

**NOTE:**  $\hat{\mu}_{n_k}$ : Mean efficiency constructed using  $n_k$  observations;  $\hat{B}_n$ : Bias constructed using  $n$  observations;  $\mu_s$ : Sample mean of true efficiency;  $\mu$ : Population mean of true efficiency.

**Table B.6:** Simple Mean Efficiency and Bias using FDH Estimator (continued)

| Panel A: Without Data Sharpening |     |      |                   |             |                           |         |        |
|----------------------------------|-----|------|-------------------|-------------|---------------------------|---------|--------|
| $p$                              | $q$ | $n$  | $\hat{\mu}_{n_k}$ | $\hat{B}_n$ | $\hat{\mu}_n - \hat{B}_n$ | $\mu_s$ | $\mu$  |
| 4                                | 1   | 10   | 1.0109            | -0.0435     | 1.0544                    | 1.8012  | 1.7979 |
| 4                                | 1   | 20   | 1.0220            | -0.0697     | 1.0917                    | 1.7958  | 1.7979 |
| 4                                | 1   | 50   | 1.0484            | -0.1317     | 1.1801                    | 1.7974  | 1.7979 |
| 4                                | 1   | 100  | 1.0755            | -0.1837     | 1.2592                    | 1.7967  | 1.7979 |
| 4                                | 1   | 200  | 1.1095            | -0.2342     | 1.3437                    | 1.7973  | 1.7979 |
| 4                                | 1   | 300  | 1.1366            | -0.2633     | 1.3999                    | 1.7982  | 1.7979 |
| 4                                | 1   | 500  | 1.1677            | -0.2943     | 1.4619                    | 1.7979  | 1.7979 |
| 4                                | 1   | 1000 | 1.2135            | -0.3226     | 1.5360                    | 1.7979  | 1.7979 |

  

| Panel B: With Data Sharpening |     |      |                   |             |                           |         |        |
|-------------------------------|-----|------|-------------------|-------------|---------------------------|---------|--------|
| $p$                           | $q$ | $n$  | $\hat{\mu}_{n_k}$ | $\hat{B}_n$ | $\hat{\mu}_n - \hat{B}_n$ | $\mu_s$ | $\mu$  |
| 4                             | 1   | 10   | 1.3675            | -0.0540     | 1.4215                    | 1.8012  | 1.7979 |
| 4                             | 1   | 20   | 1.3432            | -0.0843     | 1.4275                    | 1.7958  | 1.7979 |
| 4                             | 1   | 50   | 1.3234            | -0.1517     | 1.4752                    | 1.7974  | 1.7979 |
| 4                             | 1   | 100  | 1.3195            | -0.2058     | 1.5253                    | 1.7967  | 1.7979 |
| 4                             | 1   | 200  | 1.3235            | -0.2561     | 1.5796                    | 1.7973  | 1.7979 |
| 4                             | 1   | 300  | 1.3308            | -0.2844     | 1.6152                    | 1.7982  | 1.7979 |
| 4                             | 1   | 500  | 1.3386            | -0.3136     | 1.6522                    | 1.7979  | 1.7979 |
| 4                             | 1   | 1000 | 1.3572            | -0.3387     | 1.6960                    | 1.7979  | 1.7979 |

**NOTE:**  $\hat{\mu}_{n_k}$ : Mean efficiency constructed using  $n_k$  observations;  $\hat{B}_n$ : Bias constructed using  $n$  observations;  $\mu_s$ : Sample mean of true efficiency;  $\mu$ : Population mean of true efficiency.

**Table B.6:** Simple Mean Efficiency and Bias using FDH Estimator (continued)

| Panel A: Without Data Sharpening |     |      |                        |             |                                    |         |        |
|----------------------------------|-----|------|------------------------|-------------|------------------------------------|---------|--------|
| $p$                              | $q$ | $n$  | $\hat{\mu}_{n_\kappa}$ | $\hat{B}_n$ | $\hat{\mu}_{n_\kappa} - \hat{B}_n$ | $\mu_s$ | $\mu$  |
| 5                                | 1   | 50   | 1.0188                 | -0.0782     | 1.0971                             | 1.7965  | 1.7979 |
| 5                                | 1   | 100  | 1.0365                 | -0.1208     | 1.1573                             | 1.7959  | 1.7979 |
| 5                                | 1   | 200  | 1.0535                 | -0.1737     | 1.2272                             | 1.7966  | 1.7979 |
| 5                                | 1   | 300  | 1.0741                 | -0.2034     | 1.2775                             | 1.7980  | 1.7979 |
| 5                                | 1   | 500  | 1.0959                 | -0.2430     | 1.3389                             | 1.7981  | 1.7979 |
| 5                                | 1   | 1000 | 1.1360                 | -0.2913     | 1.4273                             | 1.7981  | 1.7979 |

  

| Panel B: With Data Sharpening |     |      |                        |             |                                    |         |        |
|-------------------------------|-----|------|------------------------|-------------|------------------------------------|---------|--------|
| $p$                           | $q$ | $n$  | $\hat{\mu}_{n_\kappa}$ | $\hat{B}_n$ | $\hat{\mu}_{n_\kappa} - \hat{B}_n$ | $\mu_s$ | $\mu$  |
| 5                             | 1   | 50   | 1.3286                 | -0.0934     | 1.4220                             | 1.7965  | 1.7979 |
| 5                             | 1   | 100  | 1.3171                 | -0.1407     | 1.4578                             | 1.7959  | 1.7979 |
| 5                             | 1   | 200  | 1.3094                 | -0.1971     | 1.5065                             | 1.7966  | 1.7979 |
| 5                             | 1   | 300  | 1.3116                 | -0.2277     | 1.5393                             | 1.7980  | 1.7979 |
| 5                             | 1   | 500  | 1.3154                 | -0.2678     | 1.5832                             | 1.7981  | 1.7979 |
| 5                             | 1   | 1000 | 1.3277                 | -0.3153     | 1.6430                             | 1.7981  | 1.7979 |

**NOTE:**  $\hat{\mu}_{n_\kappa}$ : Mean efficiency constructed using  $n_\kappa$  observations;  $\hat{B}_n$ : Bias constructed using  $n$  observations;  $\mu_s$ : Sample mean of true efficiency;  $\mu$ : Population mean of true efficiency.

**Table B.6:** Simple Mean Efficiency and Bias using FDH Estimator (continued)

| Panel A: Without Data Sharpening |     |      |                        |             |                                    |         |        |
|----------------------------------|-----|------|------------------------|-------------|------------------------------------|---------|--------|
| $p$                              | $q$ | $n$  | $\hat{\mu}_{n_\kappa}$ | $\hat{B}_n$ | $\hat{\mu}_{n_\kappa} - \hat{B}_n$ | $\mu_s$ | $\mu$  |
| 7                                | 1   | 50   | 1.0082                 | -0.0393     | 1.0475                             | 1.8019  | 1.7979 |
| 7                                | 1   | 100  | 1.0126                 | -0.0648     | 1.0774                             | 1.7979  | 1.7979 |
| 7                                | 1   | 200  | 1.0230                 | -0.1003     | 1.1233                             | 1.7985  | 1.7979 |
| 7                                | 1   | 300  | 1.0313                 | -0.1261     | 1.1574                             | 1.7978  | 1.7979 |
| 7                                | 1   | 500  | 1.0425                 | -0.1623     | 1.2048                             | 1.7982  | 1.7979 |
| 7                                | 1   | 1000 | 1.0645                 | -0.2169     | 1.2814                             | 1.7985  | 1.7979 |

  

| Panel B: With Data Sharpening |     |      |                        |             |                                    |         |        |
|-------------------------------|-----|------|------------------------|-------------|------------------------------------|---------|--------|
| $p$                           | $q$ | $n$  | $\hat{\mu}_{n_\kappa}$ | $\hat{B}_n$ | $\hat{\mu}_{n_\kappa} - \hat{B}_n$ | $\mu_s$ | $\mu$  |
| 7                             | 1   | 50   | 1.3523                 | -0.0490     | 1.4013                             | 1.8019  | 1.7979 |
| 7                             | 1   | 100  | 1.3384                 | -0.0791     | 1.4175                             | 1.7979  | 1.7979 |
| 7                             | 1   | 200  | 1.3342                 | -0.1202     | 1.4544                             | 1.7985  | 1.7979 |
| 7                             | 1   | 300  | 1.3269                 | -0.1492     | 1.4761                             | 1.7978  | 1.7979 |
| 7                             | 1   | 500  | 1.3227                 | -0.1892     | 1.5119                             | 1.7982  | 1.7979 |
| 7                             | 1   | 1000 | 1.3214                 | -0.2477     | 1.5691                             | 1.7985  | 1.7979 |

**NOTE:**  $\hat{\mu}_{n_\kappa}$ : Mean efficiency constructed using  $n_\kappa$  observations;  $\hat{B}_n$ : Bias constructed using  $n$  observation;  $\mu_s$ : Sample mean of true efficiency;  $\mu$ : Population mean of true efficiency.

**Table B.7:** Mean Standard Deviation of Estimated Efficiency using FDH Estimator

| $p$ | $q$ | $n$  | Sol1   | Sol2   | Sol3   | Sol4   | Sol5   | Sol6   | $\sigma_s$ | $\sigma$ |
|-----|-----|------|--------|--------|--------|--------|--------|--------|------------|----------|
| 1   | 1   | 10   | 0.3574 | 0.4318 | 0.6712 | 0.3165 | 0.4068 | 0.6269 | 0.5813     | 0.6028   |
| 1   | 1   | 20   | 0.4383 | 0.5039 | 0.7025 | 0.3836 | 0.4608 | 0.6440 | 0.5976     | 0.6028   |
| 1   | 1   | 50   | 0.4936 | 0.5404 | 0.6778 | 0.4541 | 0.5056 | 0.6355 | 0.5970     | 0.6028   |
| 1   | 1   | 100  | 0.5248 | 0.5575 | 0.6574 | 0.4988 | 0.5335 | 0.6295 | 0.5993     | 0.6028   |
| 1   | 1   | 200  | 0.5473 | 0.5683 | 0.6405 | 0.5311 | 0.5529 | 0.6232 | 0.6014     | 0.6028   |
| 1   | 1   | 300  | 0.5572 | 0.5729 | 0.6322 | 0.5451 | 0.5612 | 0.6194 | 0.6026     | 0.6028   |
| 1   | 1   | 500  | 0.5655 | 0.5760 | 0.6222 | 0.5573 | 0.5679 | 0.6134 | 0.6022     | 0.6028   |
| 1   | 1   | 1000 | 0.5757 | 0.5816 | 0.6144 | 0.5708 | 0.5768 | 0.6093 | 0.6025     | 0.6028   |

**NOTE:**  $\sigma_s$ : Sample standard deviation of true efficiency;  $\sigma$ : Population standard deviation of true efficiency.

**Table B.7:** Mean Standard Deviation of Estimated Efficiency using FDH Estimator (continued)

| $p$ | $q$ | $n$  | Sol1   | Sol2   | Sol3   | Sol4   | Sol5   | Sol6   | $\sigma_s$ | $\sigma$ |
|-----|-----|------|--------|--------|--------|--------|--------|--------|------------|----------|
| 2   | 1   | 10   | 0.1925 | 0.2574 | 0.5335 | 0.2461 | 0.3202 | 0.5895 | 0.5806     | 0.6028   |
| 2   | 1   | 20   | 0.2777 | 0.3539 | 0.6760 | 0.2693 | 0.3603 | 0.6662 | 0.5928     | 0.6028   |
| 2   | 1   | 50   | 0.3659 | 0.4547 | 0.7480 | 0.3191 | 0.4263 | 0.6990 | 0.5971     | 0.6028   |
| 2   | 1   | 100  | 0.4189 | 0.5066 | 0.7587 | 0.3675 | 0.4702 | 0.7047 | 0.6007     | 0.6028   |
| 2   | 1   | 200  | 0.4582 | 0.5363 | 0.7415 | 0.4120 | 0.5003 | 0.6925 | 0.6022     | 0.6028   |
| 2   | 1   | 300  | 0.4760 | 0.5456 | 0.7240 | 0.4348 | 0.5120 | 0.6800 | 0.6017     | 0.6028   |
| 2   | 1   | 500  | 0.4964 | 0.5555 | 0.7057 | 0.4618 | 0.5261 | 0.6686 | 0.6026     | 0.6028   |
| 2   | 1   | 1000 | 0.5180 | 0.5631 | 0.6809 | 0.4918 | 0.5397 | 0.6527 | 0.6029     | 0.6028   |

**NOTE:**  $\sigma_s$ : Sample standard deviation of true efficiency;  $\sigma$ : Population standard deviation of true efficiency.

**Table B.7:** Mean Standard Deviation of Estimated Efficiency using FDH Estimator (continued)

| $p$ | $q$ | $n$  | Sol1   | Sol2   | Sol3   | Sol4   | Sol5   | Sol6   | $\sigma_s$ | $\sigma$ |
|-----|-----|------|--------|--------|--------|--------|--------|--------|------------|----------|
| 3   | 1   | 10   | 0.0969 | 0.1401 | 0.3518 | 0.2275 | 0.2730 | 0.4950 | 0.5802     | 0.6028   |
| 3   | 1   | 20   | 0.1709 | 0.2302 | 0.5598 | 0.2329 | 0.2973 | 0.6216 | 0.5928     | 0.6028   |
| 3   | 1   | 50   | 0.2596 | 0.3471 | 0.7336 | 0.2571 | 0.3607 | 0.7330 | 0.5965     | 0.6028   |
| 3   | 1   | 100  | 0.3114 | 0.4140 | 0.7879 | 0.2811 | 0.4052 | 0.7592 | 0.5985     | 0.6028   |
| 3   | 1   | 200  | 0.3629 | 0.4753 | 0.8131 | 0.3168 | 0.4518 | 0.7678 | 0.6016     | 0.6028   |
| 3   | 1   | 300  | 0.3873 | 0.4999 | 0.8121 | 0.3374 | 0.4712 | 0.7624 | 0.6019     | 0.6028   |
| 3   | 1   | 500  | 0.4159 | 0.5254 | 0.8037 | 0.3653 | 0.4932 | 0.7525 | 0.6030     | 0.6028   |
| 3   | 1   | 1000 | 0.4479 | 0.5476 | 0.7806 | 0.4007 | 0.5142 | 0.7319 | 0.6030     | 0.6028   |

**NOTE:**  $\sigma_s$ : Sample standard deviation of true efficiency;  $\sigma$ : Population standard deviation of true efficiency.



**Table B.7:** Mean Standard Deviation of Estimated Efficiency using FDH Estimator (continued)

| $p$ | $q$ | $n$  | Sol1   | Sol2   | Sol3   | Sol4   | Sol5   | Sol6   | $\sigma_s$ | $\sigma$ |
|-----|-----|------|--------|--------|--------|--------|--------|--------|------------|----------|
| 4   | 1   | 10   | 0.0356 | 0.0568 | 0.1606 | 0.2162 | 0.2372 | 0.3473 | 0.5814     | 0.6028   |
| 4   | 1   | 20   | 0.0759 | 0.1044 | 0.3175 | 0.2106 | 0.2369 | 0.4529 | 0.5865     | 0.6028   |
| 4   | 1   | 50   | 0.1530 | 0.2039 | 0.5704 | 0.2159 | 0.2683 | 0.6312 | 0.5972     | 0.6028   |
| 4   | 1   | 100  | 0.2031 | 0.2752 | 0.6920 | 0.2276 | 0.3087 | 0.7184 | 0.5996     | 0.6028   |
| 4   | 1   | 200  | 0.2483 | 0.3421 | 0.7656 | 0.2429 | 0.3539 | 0.7645 | 0.6002     | 0.6028   |
| 4   | 1   | 300  | 0.2767 | 0.3825 | 0.8004 | 0.2569 | 0.3838 | 0.7854 | 0.6021     | 0.6028   |
| 4   | 1   | 500  | 0.3082 | 0.4265 | 0.8274 | 0.2753 | 0.4176 | 0.7990 | 0.6016     | 0.6028   |
| 4   | 1   | 1000 | 0.3483 | 0.4748 | 0.8370 | 0.3044 | 0.4556 | 0.7967 | 0.6031     | 0.6028   |

**NOTE:**  $\sigma_s$ : Sample standard deviation of true efficiency;  $\sigma$ : Population standard deviation of true efficiency.

**Table B.7:** Mean Standard Deviation of Estimated Efficiency using FDH Estimator (continued)

| $p$ | $q$ | $n$  | Sol1   | Sol2   | Sol3   | Sol4   | Sol5   | Sol6   | $\sigma_s$ | $\sigma$ |
|-----|-----|------|--------|--------|--------|--------|--------|--------|------------|----------|
| 5   | 1   | 50   | 0.0922 | 0.1224 | 0.4230 | 0.2053 | 0.2316 | 0.5274 | 0.5993     | 0.6028   |
| 5   | 1   | 100  | 0.1372 | 0.1841 | 0.5817 | 0.2088 | 0.2544 | 0.6511 | 0.6005     | 0.6028   |
| 5   | 1   | 200  | 0.1792 | 0.2503 | 0.7029 | 0.2167 | 0.2941 | 0.7454 | 0.6009     | 0.6028   |
| 5   | 1   | 300  | 0.2029 | 0.2879 | 0.7539 | 0.2234 | 0.3198 | 0.7815 | 0.6013     | 0.6028   |
| 5   | 1   | 500  | 0.2335 | 0.3374 | 0.8082 | 0.2347 | 0.3565 | 0.8181 | 0.6025     | 0.6028   |
| 5   | 1   | 1000 | 0.2745 | 0.4005 | 0.8581 | 0.2546 | 0.4054 | 0.8478 | 0.6029     | 0.6028   |

**NOTE:**  $\sigma_s$ : Sample standard deviation of true efficiency;  $\sigma$ : Population standard deviation of true efficiency.

**Table B.7:** Mean Standard Deviation of Estimated Efficiency using FDH Estimator (continued)

| $p$ | $q$ | $n$  | Sol1   | Sol2   | Sol3   | Sol4   | Sol5   | Sol6   | $\sigma_s$ | $\sigma$ |
|-----|-----|------|--------|--------|--------|--------|--------|--------|------------|----------|
| 7   | 1   | 50   | 0.0425 | 0.0586 | 0.2621 | 0.2107 | 0.2220 | 0.4221 | 0.6013     | 0.6028   |
| 7   | 1   | 100  | 0.0746 | 0.1000 | 0.4305 | 0.2063 | 0.2253 | 0.5493 | 0.6008     | 0.6028   |
| 7   | 1   | 200  | 0.1064 | 0.1472 | 0.5807 | 0.2062 | 0.2411 | 0.6806 | 0.6016     | 0.6028   |
| 7   | 1   | 300  | 0.1254 | 0.1785 | 0.6563 | 0.2081 | 0.2576 | 0.7457 | 0.6016     | 0.6028   |
| 7   | 1   | 500  | 0.1506 | 0.2218 | 0.7411 | 0.2124 | 0.2852 | 0.8175 | 0.6023     | 0.6028   |
| 7   | 1   | 1000 | 0.1862 | 0.2861 | 0.8404 | 0.2218 | 0.3328 | 0.8968 | 0.6034     | 0.6028   |

**NOTE:**  $\sigma_s$ : Sample standard deviation of true efficiency;  $\sigma$ : Population standard deviation of true efficiency.

## Appendix C Details and Additional Results from Simulations for CRS-DEA Estimator

In this appendix, we conduct extensive Monte-Carlo experiments to illustrate the performance of our proposed method for CRS-DEA estimator. For CRS estimator, the technology needs to be globally constant returns to scale. Following [Kneip et al. \(2015\)](#), we use the following technology,

$$y_i^\partial(x_i) = \prod_{j=1}^p x_{ji}^{1/p}, \quad (\text{C.1})$$

The inefficiency is generated similarly as for VRS-DEA estimator presented in [Appendix A](#). Instead of using VRS-DEA estimator, here we use CRS-DEA estimator.

The results are summarized in [Figure C.1](#), confirming the improved performance of our proposed method for CRS-DEA estimator.

**Figure C.1:** Empirical Coverages for the Simple Mean Efficiency using CRS-DEA Estimator

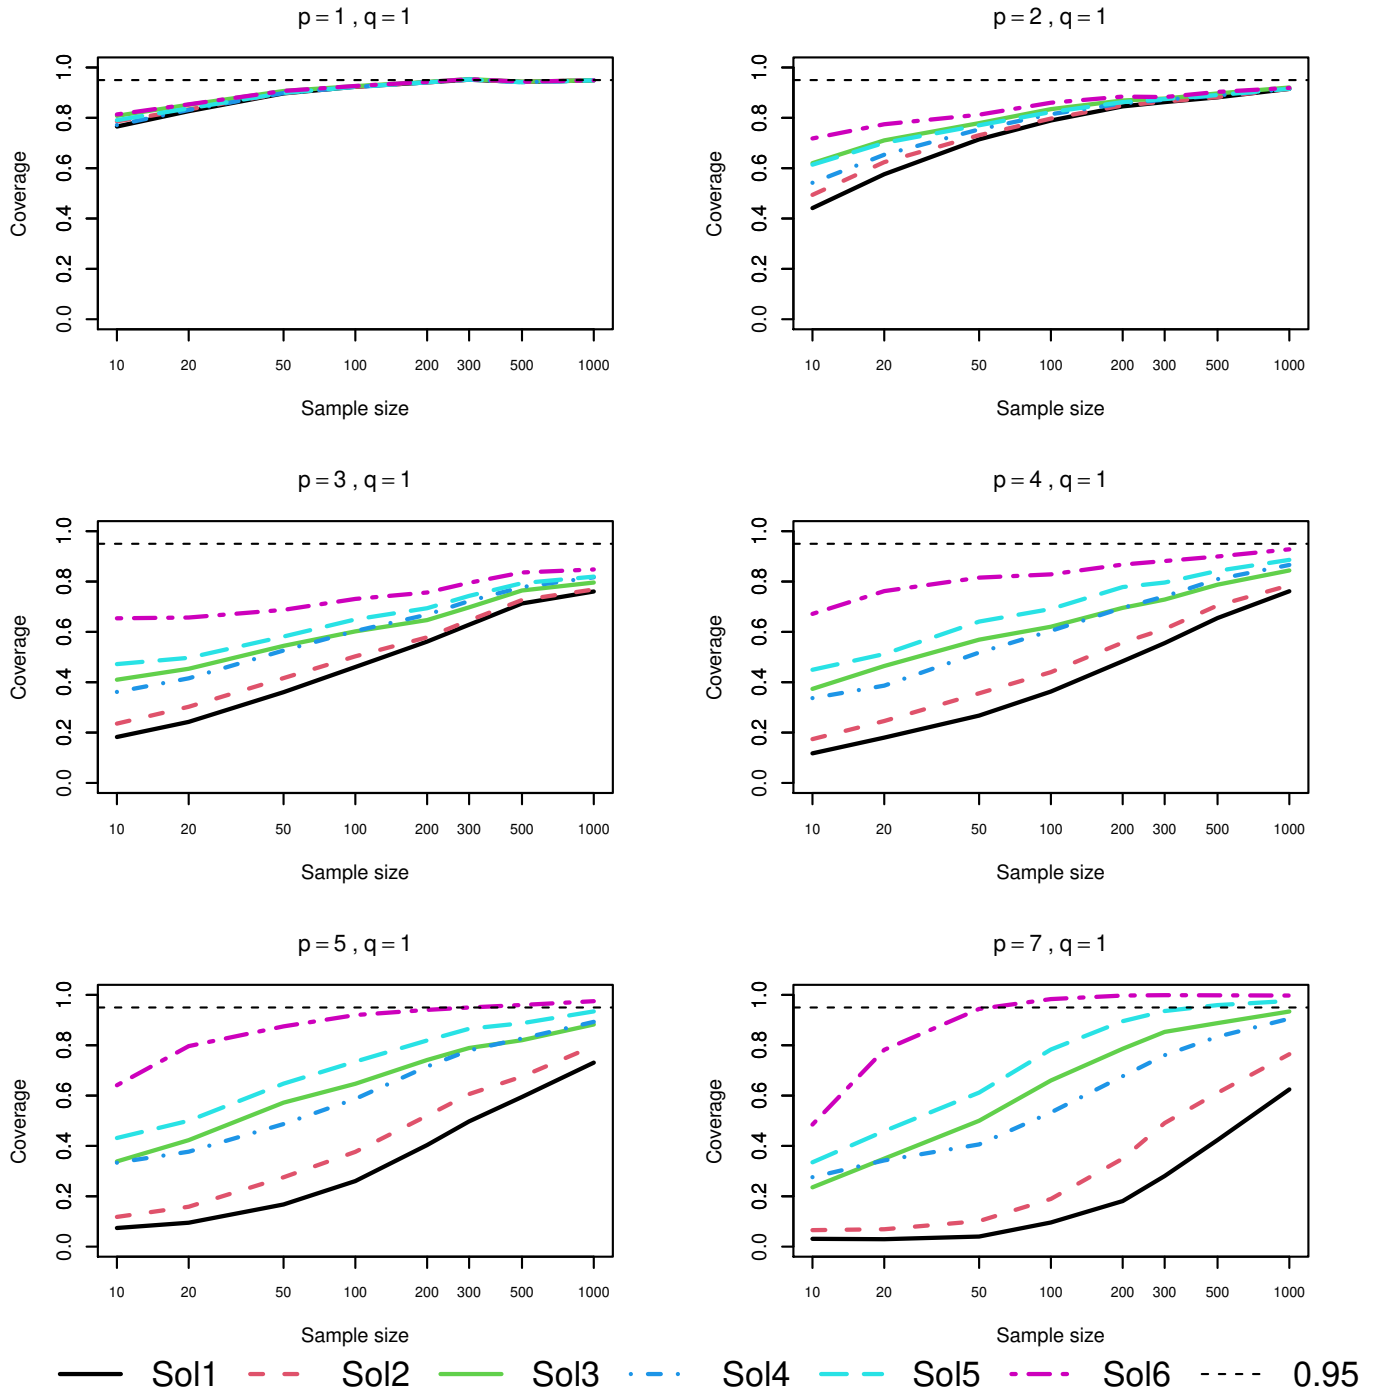

**NOTE:** A (base-10) logarithmic scale is used on the horizontal axis.

## References

- Kneip, A., L. Simar, and P. W. Wilson (2015), When bias kills the variance: Central limit theorems for DEA and FDH efficiency scores, *Econometric Theory* 31, 394–422.
- Nguyen, H., L. Simar, and V. Zelenyuk (2022), Data sharpening for improving CLT approximations for DEA-type efficiency estimators, *European Journal of Operational Research*, forthcoming.
- Simar, L. and V. Zelenyuk (2020), Improving finite sample approximation by central limit theorems for estimates from Data Envelopment Analysis, *European Journal of Operational Research* 284, 1002–1015.
